# Supplementary material
Source: ML conference proceedings conference paper supplement (https://proceedings.mlr.press/v108/kong20b.html)
Supplement: Supplementary file [file kong20b-supp.pdf]

---

# Sublinear Optimal Policy Value Estimation in Contextual Bandits

---

**Weihao Kong**  
University of Washington

**Gregory Valiant**  
Stanford University

**Emma Brunskill**  
Stanford University

## Abstract

We study the problem of estimating the expected reward of the optimal policy in the stochastic disjoint linear bandit setting. We prove that for certain settings it is possible to obtain an accurate estimate of the optimal policy value even with a number of samples that is sublinear in the number that would be required to *find* a policy that realizes a value close to this optima. We establish nearly matching information theoretic lower bounds, showing that our algorithm achieves near optimal estimation error. Finally, we demonstrate the effectiveness of our algorithm on joke recommendation and cancer inhibition dosage selection problems using real datasets.

## 1 Introduction

We consider how to efficiently estimate the best possible performance of the optimal representable decision policy in a disjoint linear contextual multi-armed bandit setting. Critically, we are interested in when it is possible to estimate this best possible performance using a sublinear number of samples, whereas a linear number of samples would typically be required to provide any such policy that can realize optimal performance.

Contextual multi-armed bandits (see e.g. Chu et al. (2011); Li et al. (2010); Agarwal et al. (2014)) are a well studied setting that is having increasing influence and potential impact in a wide range of applications, including customer recommendations (Li et al., 2010; Zhou and Brunskill, 2016), education (Lan and Baraniuk, 2016) and health (Greenewald et al., 2017). In contrast to simulated domains like games and robotics simulators, in many contextual bandit applications the best potential performance of the algorithm is unknown

in advance. Such situations will often involve a human-in-the-loop approach to optimizing system performance, where a human expert specifies a set of features describing the potential contexts and a set of possible interventions/arms, and then runs a contextual bandit algorithm to try to identify a high performing decision policy for what intervention to automatically provide in which context. A key issue facing the human expert is assessing if the current set of context features and set of interventions/arms can yield sufficient performance. This can be challenging, because without prior knowledge about what optimal performance might be possible, the human may need to run the contextual bandit algorithm until it returns an optimal policy given the current set of arms and features, which may involve wasted time and effort if the best policy has mediocre performance. While there has been some limited algorithmic work on such human-in-the-loop settings for reinforcement learning (Mandel et al., 2017; Keramati and Brunskill, 2019) to our knowledge no formal analysis exists of how to efficiently estimate the average reward of the optimal policy representable with the current set of context features and arms.

The majority of prior work on multi-armed bandits has focused on online algorithms that minimize cumulative or per-step regret (see e.g. Auer et al. (2002); Agarwal et al. (2014) or Lattimore and Szepesvári (2018)). In simple multi-armed bandit settings (with no context) there has also been work on maximizing the probability of best arm identification given a fixed budget (Bubeck et al., 2009; Audibert et al., 2010; Gabillon et al., 2012; Karnin et al., 2013) or minimizing the number of samples needed to identify the best arm with high confidence (Even-Dar et al., 2006; Maron and Moore, 1994; Mnih et al., 2008; Jamieson et al., 2014). Note that in the simple multi-arm bandit setting, sample complexity bounds for  $\epsilon$ -best arm identification will be equivalent to the bounds achievable for estimating the expected reward of the optimal policy as there is no sharing of rewards or information across arms.

In the case of contextual multi-armed bandits, there has been some limited work on single best arm identification when the arms are described by a high di-

mensional feature vector (Hoffman et al., 2014; Soare et al., 2014; Xu et al., 2018). However such work does not immediately include input context features (such as from a customer or patient), and would need to be extended to handle best policy identification over (as we consider here) a linear class of policies. A separate literature seeks to identify a good policy for future use given access to batch historical data in both bandit and reinforcement learning settings (Thomas et al., 2015; Athey and Wager, 2017; Gelada and Bellemare, 2019; Liu et al., 2019). In contrast to such work, we consider the setting where the algorithm may actively gather data, and the objective is to accurately estimate the performance of the optimal policy in the set, *without returning a policy that achieves such performance*.

In particular, in this work we consider disjoint linear contextual bandits (Li et al., 2010) (one parameter for each of a finite set of arms, such as a set of treatments) with a high dimensional,  $d$ , input context (such as a set of features describing the patient). We are interested in providing an accurate estimate of the expected performance of the best realizable decision policy. Here the decision policy class is implicitly defined by the input context feature space and finite set of arms. Following prior work on disjoint linear contextual bandits (see e.g. Li et al. (2010)) we assume that the reward for each arm can be expressed as a linear combination of the input features and an arm-specific weight vector.

Quite surprisingly, we present an algorithm that can estimate the potential expected reward of the best policy with a number of samples (pulls of the arms) that is sublinear in the input context dimension  $d$ . This is unintuitive because this is less than what is needed to estimate *any* fit of the  $d$ -dimensional arm weight vector, which would require at least  $d$  samples. Our approach builds on recent work Kong and Valiant (2018) that shows a related result in the context of regression, showing that the best accuracy of a regression algorithm can, in many situations, be estimated with sublinear sample size. A critical insight in that paper, which we leverage and build upon in our work, is the construction of a sequence of unbiased estimators for geometric properties of the data that can be used to estimate the best accuracy, without attempting to find the model achieving that accuracy. However, multiple additional technical subtleties arise when we move from the prediction setting to the control setting because we need to take the interaction between different arms into account while there is effectively only one ‘‘arm’’ in the prediction setting. Even assuming that we have learned the interaction between the arms, it is not immediately clear how such knowledge helps determine the potential expected reward of the best policy. We leverage a quantitative version of the Sudakov-Fernique

inequality to answer the question. While in the classical (non-disjoint) stochastic linear bandit problem, it is crucial to use the information we learn from one arm to infer information for other arms, this does not hold in the non-disjoint setting. Nevertheless, we utilize the contexts across all the arms to reduce the estimation error, which yields a near optimal sample complexity dependency on the number of arms. Our approach can also leverage unsupervised prior data about the distribution of contexts, as may often be available (past patients’ features or prior customers’ features), in order to further improve the algorithm performance.

Our key contribution is an algorithm for accurately estimating the expected performance of the optimal policy in a disjoint contextual linear bandit setting with an amount of samples that is sublinear in the input context dimension. We provide theoretical bounds when the input context distributions are drawn from Gaussians with zero mean and known or unknown covariances. We then examine the performance empirically, first in a synthetic setting. We then evaluate our method both in identifying the optimal reward for a joke recommendation decision policy, based on the Jester dataset (Goldberg et al., 2001), and on a new task we introduce of predicting the performance of the best linear threshold policy for selecting the dosage level to optimize cancer cell growth inhibition in the NCI-60 Cancer Growth Inhibition dataset. Encouragingly, our results suggest that our algorithm quickly obtains an accurate estimate of the optimal linear policy.

## 2 Problem Setting

A contextual multi-armed bandit (CMAB) can be described by a set of contexts  $\mathcal{X} \in \mathcal{R}^d$ , a set of  $K$  arms  $\mathcal{K}$  and a reward function. We consider the linear disjoint CMAB setting (Li et al., 2010), where there are a finite set of arms, and the reward  $y$  from pulling an arm  $a$  in a context  $\mathbf{x}_j$  is

$$y_{a,j} = \beta_a^T \mathbf{x}_j + b_a + \eta_{a,j}. \quad (1)$$

For each arm  $a$ ,  $\beta_a$  is an unknown  $d$ -dimensional real vector with bounded  $\ell_2$  norm and  $b_a$  is a real number,  $\mathbf{E}[\eta_{a,j}] = 0$  and  $\mathbf{E}[\eta_{a,j}^2]$  is bounded by a constant.

For simplicity, we focus primarily on the passive setting where for each arm  $a$ , we observe  $N$  iid samples  $\mathbf{x}_{a,1}, \mathbf{x}_{a,2}, \dots, \mathbf{x}_{a,N}$  drawn from  $N(0, \Sigma)$ , and each sample  $\mathbf{x}_{a,j}$  is associated with a reward. Under this setting, we denote  $\sigma_a^2$  as the variance of  $y_{a,j}$ , which is smaller than  $\beta_a^T \Sigma \beta_a + \mathbf{E}[\eta_{a,j}^2]$ , and it is assumed that  $\sigma_a$  are all bounded by a constant. We define the total number of samples  $T = K \cdot N$  to draw a connection to the adaptive setting where the algorithm can adaptively choose the action to play on each context. Interestingly,

in the worst case our approach of uniformly gathering samples across all actions is optimal up to a  $\log^{3/2}(dK)$  factor (see Theorem 2).

Given a total of  $T = K \cdot N$  samples  $(\mathbf{x}_{a,j}, y_j)$ , our goal is to predict the expected reward of the optimal policy realizable with the input definition of context features and finite set of actions, which is  $OPT := \mathbf{E}_{\mathbf{x}}[\max_a(\beta_a^T \mathbf{x} + b_a)]$ .

### 3 Summary of Results

Our first result applies to the setting where each context is drawn from a  $d$ -dimensional Gaussian distribution  $N(0, \Sigma)$ , with a *known* covariance matrix  $\Sigma$ , and the reward for the  $a$ th arm on context  $\mathbf{x}_j$  equals  $\beta_a^T \mathbf{x}_j + b_a + \eta_{a,j}$  where  $\mathbf{E}[\eta_{a,j}] = 0$ ,  $\mathbf{E}[\eta_{a,j}^2]$  is bounded by a constant.<sup>1</sup> Given  $N = \Theta(\epsilon^{-2} \sqrt{d} \log K \log(K/\delta))$  samples for each arm, there is an efficient algorithm that with probability  $1 - \delta$  estimates the optimal expected reward with additive error  $\epsilon$ .

**Corollary 1** (Main result, known covariance setting). *In the known covariance setting, for any  $\epsilon \geq \frac{\sqrt{\log K}}{d^{1/4}}$ , with probability  $1 - \delta$ , Algorithm 1 estimates the optimal reward  $OPT$  with additive error  $\epsilon$  using a total number of samples*

$$T = \Theta\left(\frac{\sqrt{d}K \log K}{\epsilon^2} \log(K/\delta)\right).$$

We prove a near matching lower bound, showing that in this passive setting, the estimation error can not be improved by more than a  $\log K$  factor. The proof of Theorem 1 can be found in the supplementary material.

**Theorem 1** (Lower bound for passive algorithms, known covariance setting). *There exists a constant  $C$  such that for any  $\epsilon > 0$  given*

$$T = C \frac{\sqrt{d}K \log K}{\epsilon^2}$$

*samples (equivalently  $N = C \frac{\sqrt{d} \log K}{\epsilon^2}$  samples for each arm), no algorithm can estimate the optimal reward with expected additive error less than  $\epsilon$  with probability greater than  $2/3$ .*

Comparing against the adaptive setting where the algorithm can adaptively choose the action to play on each

<sup>1</sup>The setting where the covariance,  $\Sigma$ , is known is equivalent to the setting where the covariance is assumed to be the identity, as the data can be re-projected so as to have identity covariance. While the assumption that the covariance is known may seem stringent, it applies to the many settings where there is a large amount of *unlabeled* data. For example, in many medical or consumer data settings, an accurate estimate of the covariance of  $\mathbf{x}$  can be obtained from large existing databases.

context, we prove a surprising lower bound, showing that the estimation error can not be improved much. Specifically, our passive algorithm is minimax optimal even in the *adaptive setting* up to a polylog( $dK$ ) factor. The proof is deferred to the supplementary material.

**Theorem 2** (Lower bound for fully adaptive algorithms, known covariance setting). *There exists a constant  $C$  such that no algorithm can estimate the optimal reward with additive error  $\epsilon$  and probability of success at least  $2/3$  using a number of rounds that is less than*

$$T = C \frac{\sqrt{d}K}{\epsilon^2 \log^{3/2}(dK)}.$$

Our lower bound is novel, and we are not aware of similar results in this setting. It is curious that the standard approach by simply bounding the KL-divergence only yields a sub-optimal  $\tilde{O}(\sqrt{d}K)$  lower bound, since the divergence contribution of each arm scales with  $\mathbf{E}[T_i^2]$  instead of  $\mathbf{E}[T_i]$  in the classical (non-contextual) stochastic bandit setting. We apply a special conditioning to get around this issue.

Our algorithmic techniques apply beyond the known covariance setting, and we prove an analog of Corollary 1 in the setting where the contexts  $\mathbf{x}$  are drawn from a Gaussian distribution with arbitrary *unknown* covariance. Our general result, given in Corollary 7, is quite complicated. Here we highlight the special case where the desired accuracy  $\epsilon$  and failure probability  $\delta$  are small positive constants, and the covariance is well-conditioned:

**Corollary 2** (Special case of main result, unknown covariance setting). *Assuming that the covariance of the context  $\mathbf{x}_i$  satisfies  $\sigma_{\min} I_d \preceq \Sigma \preceq \sigma_{\max} I$  and  $\sigma_{\max}/\sigma_{\min}$  is a constant, for constant  $\epsilon$ , Algorithm 1 takes  $\sigma_{\min}, \sigma_{\max}$ , and a total number of*

$$T = O\left(d^{1 - \frac{C}{\log \log K + \log(1/\epsilon)}} K^\gamma + \sqrt{d}K^{1+\gamma}\right)$$

*samples, where  $\gamma$  is any positive constant and  $C$  is a universal constant.*

In the unknown covariance setting, the dependency on  $d$  of our algorithm is still sublinear, though is much worse than the  $\sqrt{d}$  dependency in the known covariance setting. However this can not be improved by much as the lower bound result in Kong and Valiant (2018) implies that the dependency on  $d$  is at least  $d^{1 - \Theta(\frac{1}{\log 1/\epsilon})}$

It is worth noting that the techniques behind our result in the unknown covariance setting that achieves sublinear sample complexity essentially utilizes a set of unlabeled examples of size  $O(T)$  to reduce the variance of the estimator, where unlabeled examples are the context vectors  $\mathbf{x}_i$  drawn from  $N(0, \Sigma)$ . If one has an even

larger set of unlabeled examples, the sample complexity for the labeled examples can be significantly reduced. For simplicity, we do not present a complete trade-off result between the labeled and unlabeled examples in this paper. Instead, we present one extreme case where there is a sufficiently large set of unlabeled examples (size  $\Omega(d)$ ), and the problem essentially reduces to the known covariance problem.

**Corollary 3** (Unknown covariance with a large set of unlabeled examples). *In the unknown covariance setting, there is an algorithm that estimates the optimal reward  $OPT$  with additive error  $\epsilon$  with probability  $1 - \delta$  using a total number of labeled examples*

$$T = \Theta\left(\frac{\sqrt{d}K \log K}{\epsilon^2} \log(K/\delta)\right),$$

and a set of unlabeled examples of size  $\Theta((d + \log 1/\delta) \log^2 K/\epsilon^4)$

The algorithm that achieves the above result is straight forward. We first estimate the covariance of the context using the set of unlabeled examples up to  $\epsilon$  spectral norm error, and let us denote  $\hat{\Sigma}$  as the estimator. Given the covariance estimator, we will execute Algorithm 1 for the known covariance setting, and scale each context  $\mathbf{x}_i$  as  $\hat{\Sigma}^{-1/2} \mathbf{x}_i$ . The covariance of the scaled context is not exactly the identity, hence our estimator is biased. However, it is straight forward to show that the bias is at most  $O(\epsilon)$ , which is on the same magnitude as the standard deviation of our estimator. The proof is deferred to the appendix.

Finally, we slightly generalize our results beyond the Gaussian context setting and show that if each context is drawn from a mixture of  $M$  Gaussian distributions which is completely known to the algorithm, then our algorithm can be applied to achieve  $\epsilon$  estimation error while the sample complexity only increases by a factor of  $\log M$ . The proof is deferred to the appendix.

**Theorem 3** (Extension to Gaussian Mixtures). *Suppose each context  $\mathbf{x}$  is drawn independently from a mixture of Gaussian distributions  $\sum_{i=1}^M \alpha_i N(\mu_i, \Sigma_i)$ , and the parameters  $\mu_i, \Sigma_i, \alpha_i$  are all known to the algorithm. In addition, let us assume that  $\|\mu_i\|, \|\Sigma_i\|$  are all bounded by a constant. Then for any  $\epsilon \geq \frac{\sqrt{\log K}}{d^{1/4}}$ , with probability  $1 - \delta$ , there is an algorithm that estimates the optimal reward  $OPT$  with additive error  $\epsilon$  using a total number of samples*

$$T = \Theta\left(\frac{\sqrt{d}K \log K}{\epsilon^2} \log(KM/\delta)\right).$$

## 4 The Estimators

The basic idea of our estimator for the optimal reward of linear contextual bandits is as follows. For

illustration, we assume that each context  $\mathbf{x}$  is drawn from a standard Gaussian distribution  $N(0, I_d)$ . In the realizable setting where the reward for pulling arm  $a$  on context  $\mathbf{x}_j$  is  $\beta_a^T \mathbf{x}_j + b_a + \eta_{a,j}$  where  $\beta_a, b_a$  are the parameters associated with arm  $a$  and  $\eta_{a,j}$  is random noise with mean 0, the expected reward of the optimal policy is simply  $\mathbf{E}_{\mathbf{x}}[\max_a(\beta_a^T \mathbf{x} + b_a)]$ . Let us define the  $K$  dimensional random variable  $r = (\beta_1^T \mathbf{x} + b_1, \beta_2^T \mathbf{x} + b_2, \dots, \beta_K^T \mathbf{x} + b_K)$ . Notice that in the setting where  $\mathbf{x} \sim N(0, I)$ ,  $r$  is a  $K$  dimensional Gaussian random variable with mean  $\mathbf{b} = (b_1, \dots, b_K)$  and covariance  $H$  where  $H_{a,a'} = \beta_a^T \beta_{a'}$ . Hence in this simplified setting, the optimal reward of the linear contextual bandit problem can be expressed as  $\mathbf{E}_{\mathbf{r} \sim N(\mathbf{b}, H)}[\max_i r_i]$  which is a function of  $\mathbf{b}$  and  $H$ . Naturally, one can hope to estimate the optimal reward by first accurately estimating  $\mathbf{b}$  and  $H$ . The bias  $\mathbf{b}$  can be accurately estimated up to entry-wise error  $O(\sqrt{\frac{1}{N}})$  by computing the average of the reward of each arm, simply because for any  $i$ ,  $y_{a,i}$  is an unbiased estimator of  $b_a$ .

Recently Kong and Valiant (2018) proposed an estimator for  $\beta^T \beta$  in the context of learnability estimation, or noise level estimation for linear regression. In the setting where each covariate  $\mathbf{x}_i$  is drawn from a distribution with zero mean and identity covariance, and response variable  $y_i = \beta^T \mathbf{x}_i + \eta_i$  with independent noise  $\eta_i$  having zero mean, they observe that for any  $i \neq j$ ,  $y_i y_j \mathbf{x}_i^T \mathbf{x}_j$  is an unbiased estimator of  $\beta^T \beta$ . In addition, they showed that the error rate of estimating  $\beta^T \beta$  using the proposed estimator  $\frac{1}{\binom{N}{2}} \sum_{i \neq j} y_i y_j \mathbf{x}_i^T \mathbf{x}_j$  is  $O(\frac{d+N}{N^2})$  which implies that one can accurately estimate  $\beta^T \beta$  using  $N = O(\sqrt{d})$  samples. Their estimator can be directly applied to estimate  $\beta_a^T \beta_{a'}$ , and we extend their techniques to the contextual bandit setting for estimating  $\beta_a \beta_{a'}$  for arbitrary  $a, a'$ . In order to estimate  $\beta_a^T \beta_{a'}$  for  $a \neq a'$ , notice that for any  $i, j$ ,  $\mathbf{E}[y_{a,i} y_{a',j} \mathbf{x}_{a,i}^T \mathbf{x}_{a',j}] = \beta_a^T \mathbf{x}_{a,i} \mathbf{x}_{a',j}^T \beta_{a'} = \beta_a^T \beta_{a'}$ , and we simply take the average of all these unbiased estimators of  $\beta_a^T \beta_{a'}$ . We show that  $O(\sqrt{d})$  samples for each arm suffices for accurate estimation of  $\beta_a^T \beta_{a'}$  for arbitrary pairs of arms  $a, a'$ .

Once we have estimates  $\hat{\mathbf{b}}, \hat{H}$  for  $\mathbf{b}$  and  $H$ , if  $\hat{H}$  is a PSD matrix, our algorithm simply outputs  $\mathbf{E}_{\mathbf{r} \sim N(\hat{\mathbf{b}}, \hat{H})}(\max_i r_i)$ , otherwise, let  $\hat{H}^{(PSD)}$  be the projection of  $\hat{H}$  on to the PSD cone and output  $\mathbf{E}_{\mathbf{r} \sim N(\hat{\mathbf{b}}, \hat{H}^{(PSD)})}(\max_i r_i)$ . Given an approximation of  $\mathbf{b}, H$ , it is not immediately clear how the errors in estimating  $\mathbf{b}, H$  translate to the error in estimating  $\mathbf{E}_{\mathbf{r} \sim N(\mathbf{b}, H)}[\max_i r_i]$ . Our Proposition 1 leverages a quantitative version of the Sudakov-Fernique inequality due to Chatterjee (2005) and shows that if each entry of  $H$  is perturbed by at most  $\epsilon$ , the optimal re-

ward  $\mathbf{E}_{\mathbf{r} \sim N(\mathbf{b}, H)}[\max_i r_i]$  can only change by  $2\sqrt{\log K}$ . Because  $\mathbf{E}_{\mathbf{x} \sim N(\hat{\mathbf{b}}, \hat{H})}(\max_i x_i + b_i)$  has no closed-form expression in general, we use Monte Carlo simulation to approximate  $\mathbf{E}_{\mathbf{x} \sim N(\hat{\mathbf{b}}, \hat{H})}(\max_i x_i + b_i)$  in the implementation.

Our estimator for the general unknown covariance setting is much more involved. Assuming each context  $\mathbf{x}$  is drawn from a Gaussian distribution with zero mean and unknown covariance  $\Sigma$ , the optimal reward  $\mathbf{E}_{\mathbf{x} \sim N(0, \Sigma)}[\max_a(\beta_a^T \mathbf{x} + b_a)]$  is equal to  $\mathbf{E}_{\mathbf{r} \sim N(\mathbf{b}, H)}[\max_i r_i]$  where  $\mathbf{r} \sim N(\mathbf{b}, H)$  and  $H_{a,a'} = \beta_a \Sigma \beta_{a'}$ . Again, we extend the estimator proposed in Kong and Valiant (2018) for  $\beta^T \Sigma \beta$  in the linear regression setting to the contextual linear bandit setting for estimating  $\beta_a \Sigma \beta_{a'}$  for arbitrary  $a, a'$ . For each  $a, a'$ , we design a series of unbiased estimators for  $\beta_a^T \Sigma^2 \beta_{a'}, \beta_a^T \Sigma^3 \beta_{a'}, \beta_a^T \Sigma^4 \beta_{a'}, \dots$  and approximate  $\beta_a^T \Sigma \beta_{a'}$  with a linear combination of these high order estimates. Our major contribution is a series of estimators which incorporate unlabeled examples. In the contextual bandit setting, especially when  $K$  is large, it is essential to incorporate unlabeled data, simply because when we estimate  $\beta_a \Sigma^k \beta_{a'}$ , the large number of examples which do not involve arm  $a$  or  $a'$  are effectively unlabeled examples and can be leveraged to significantly reduce the overall variance for estimating  $\beta_a \Sigma^k \beta_{a'}$ . We prove variance bounds in Corollary 6 for these novel estimators whose accuracy depends on both the number of labeled examples and unlabeled examples. As a side note, our estimator can also be applied to the setting of estimating learnability to better utilize the unlabeled examples. Proofs, where omitted, are in the appendix.

#### 4.1 Main Algorithm

Our main algorithm is described in Algorithm 1. In line 1, we repeat the for loop body  $\Theta(\log(K/\delta))$  times, and at each time, we collect  $n$  i.i.d. sample for each arm. Hence the total number of samples for each arm  $N = \Theta(n \log(K/\delta))$ . For ease of notations, we will use  $n$  instead of  $N$  when we write down the error rate of the algorithm.

In line 3, 4, 5, for each arm  $a$  we collect  $n$  i.i.d. samples and estimate the bias of that arm  $b_a$ . The estimation error of the bias vector  $\mathbf{b}$  is bounded by the following corollary, and the claim holds by applying Chebyshev's inequality with the variance of  $y_{a,i}$ .

**Corollary 4.** *For each arm  $a$ , with probability  $2/3$ ,  $|\frac{1}{n} \sum_{i=1}^n y_{a,i} - b_a| \leq 3\sqrt{\frac{1}{n} \sigma_a^2}$ , where  $\sigma_a^2 = \mathbf{Var}[y_{a,i}]$ .*

After estimating  $b_a$ , we can subtract  $b_a$  from all the  $y_{a,i}$ . For sufficiently large  $n$ , our estimate of  $b_a$  is accurate enough such that we can assume that  $y_{a,i} =$

$\beta_a^T \mathbf{x}_{a,i} + \eta_{a,i}$ . After collecting  $n$  i.i.d. samples from each arm, in the known covariance setting, we run Algorithm 2 to estimate the covariance  $H$  in line 8. In the unknown covariance setting, we need to split the  $n$  examples for each arm into one labeled example set and one unlabeled example set, and then run Algorithm 3 (see appendix) to estimate the covariance  $H$ . Bounds on Algorithm 2 and Algorithm 3 are formulated in the following two corollaries.

**Corollary 5.** *Given  $n$  independent samples for each arm, for a fixed pair  $a, a'$ , with probability at least  $2/3$ , the output of Algorithm 2 satisfies*

$$|\hat{H}_{a,a'} - H_{a,a'}| \leq 3\sqrt{\frac{9d+3n}{n^2} \sigma_a \sigma_{a'}},$$

where  $\sigma_a^2 = \mathbf{Var}[y_{a,i}]$ .

The above corollary follows from applying Chebyshev's inequality with the variance bound established in Proposition 3 and Proposition 2.

**Corollary 6.** *Given  $n$  independent samples for each arm, and  $s$  unlabeled examples, for a fixed pair  $a, a'$ , with probability at least  $2/3$ , the output of Algorithm 3 satisfies*

$$|\hat{H}_{a,a'} - H_{a,a'}| \leq \min\left(\frac{2}{k^2}, 2e^{-(k-1)}\sqrt{\frac{\sigma_{\min}}{\sigma_{\max}}}\right) + f(k) \max\left(\frac{d^{k/2}}{s^{k/2}}, 1\right)\sqrt{\frac{d+n}{n^2}},$$

where  $f(k) = k^{O(k)}$ .

The above corollary follows from applying Chebyshev's inequality with the variance bound established in Proposition 4. Notice that after sample splitting in Algorithm 1, the size of the set of the unlabeled examples  $s = Kn/2$ .

Since each entry of our estimate of  $\mathbf{b}$ , the output of Algorithm 2 and Algorithm 3, only satisfies the bound in Corollary 4, Corollary 5 or Corollary 6 respectively with probability  $2/3$ , we boost the entry-wise success probability to  $1 - \delta/(K^2 + K)$  by repeating the estimation procedure  $\Theta(\log(K/\delta))$  times and computing the median of our estimates (line 19 to line 20), such that the overall success probability is at least  $1 - \delta$ . We formalize the effect of this standard procedure in Fact 11.

Line 21 projects the matrix  $\hat{H}$  onto the PSD cone and obtains the PSD matrix  $\hat{H}_{PSD}$ . This step is a convex optimization problem and can be solved efficiently. By the triangle inequality and the upper bound of  $\max_{i,j} |\hat{H}_{i,j} - H_{i,j}|$ , the discrepancy after this projection:  $\max_{i,j} |\hat{H}_{i,j}^{(PSD)} - H_{i,j}|$  can be bounded with the upper bound in Corollary 5 and Corollary 6 up to a factor of 2.

Now that we have established upper bounds on the estimation error of  $\mathbf{b}$  and  $H$ , we use these to bound the estimation error of the optimal reward.

**Proposition 1.** *Let  $H \in R^{m \times m}$  and  $H' \in R^{m \times m}$  be two PSD matrices,  $\mathbf{b}, \mathbf{b}'$  be two  $d$ -dimensional real vectors. We have  $|\mathbf{E}_{\mathbf{x} \sim N(\mathbf{b}, H)}[\max_i x_i] - \mathbf{E}_{\mathbf{x} \sim N(\mathbf{b}', H')}[\max_i x_i]| \leq 2\sqrt{\max_{i,j} |H_{i,j} - H'_{i,j}| \log K + \max_i |b_i - b'_i|}$ .*

**Algorithm 1** Main Algorithm for Estimating  $OPT$ , the Optimal Reward [Corollary 1, Corollary 2]

---

```

1: for  $i = 1$  to  $\lceil 48(\log(K^2/\delta) + 1) \rceil$  do
2:   for  $a = 1$  to  $K$  do
3:     Pull the  $a$ 'th arm  $n$  times, and let matrix
        $X_a = [\mathbf{x}_{a,1}^\top \cdots \mathbf{x}_{a,n}^\top]^\top$  consists of the  $n$  con-
       texts,  $\mathbf{y}_a = [y_{a,1} \cdots y_{a,n}]^\top$  consists of the  $n$ 
       rewards.
4:      $\hat{b}_a^{(i)} \leftarrow \mathbf{1}^\top \mathbf{y}_a / n$ . {Estimate  $b_a$ .}
5:      $\mathbf{y}_a \leftarrow \mathbf{y}_a - \hat{b}_a^{(i)} \mathbf{1}$ . {Subtract  $b_a$  off to make it
       zero mean.}
6:   end for
7:   if Known covariance then
8:      $\hat{H}^{(i)} \leftarrow \mathbf{Algorithm\ 2}(\{X_a\}_{a=1}^K, \{\mathbf{y}_a\}_{a=1}^K)$ .
       {Corollary 5}
9:   else
10:    for  $a = 1$  to  $K$  do
11:       $X_a^\top \leftarrow [\mathbf{x}_{a,1}^\top \cdots \mathbf{x}_{a,n/2}^\top]$ .
12:       $\mathbf{y}_a^\top \leftarrow [y_{a,1} \cdots y_{a,n/2}]$ .
13:       $S_a^\top \leftarrow [\mathbf{x}_{a,n/2+1}^\top \cdots \mathbf{x}_{a,n}^\top]$ . {Split  $\mathbf{x}$  into a
        labeled and an unlabeled example set}
14:    end for
15:     $S \leftarrow [S_1^\top \cdots S_K^\top]^\top$ .
16:     $\hat{H}^{(i)} \leftarrow \mathbf{Algorithm\ 3}(\{X_a\}_{a=1}^K, \{\mathbf{y}_a\}_{a=1}^K, S, p(x))$ . {Corollary 6}
17:  end if {Estimate  $H$ .}
18: end for
19: For all  $1 \leq i, j \leq K$ ,
    $\hat{H}_{i,j} \leftarrow \mathbf{median}(\hat{H}_{i,j}^{(1)}, \dots, \hat{H}_{i,j}^{(\lceil 48(\log(K^2/\delta)+1) \rceil)})$ .
20: For all  $1 \leq i \leq K$ ,
    $\hat{b}_i \leftarrow \mathbf{median}(\hat{b}_i^{(1)}, \dots, \hat{b}_i^{(\lceil 48(\log(K^2/\delta)+1) \rceil)})$ .
21:  $\hat{H}^{(PSD)} \leftarrow \mathbf{argmin}_{M \succ 0} \max_{i,j} |\hat{H}_{i,j} - M_{i,j}|$ 
   {Project onto the PSD cone under the max norm.}
22: Output:  $\mathbf{E}_{\mathbf{r} \sim N(\hat{\mathbf{b}}, \hat{H}^{(PSD)})}[\max_i r_i]$ .
```

---

We are ready to state our main theorem for the known covariance setting.

**Theorem 4** (Main theorem on Algorithm 1, known covariance setting). *In the known covariance setting, with probability at least  $1 - \delta$ , Algorithm 1 estimates the expected reward of the optimal policy with error*

*bounded as follows:*

$$|OPT - \widehat{OPT}| = O(\sqrt{\log K} (\frac{d+n}{n^2})^{1/4})$$

For the following main theorem on the general unknown covariance setting, the proof is identical to the proof of Theorem 4.

**Theorem 5** (Main theorem on Algorithm 1, unknown covariance setting). *In the unknown covariance setting, for any positive integer  $k$ , with probability  $1 - \delta$ , Algorithm 1 estimates the optimal reward  $OPT$  with additive error:*

$$|OPT - \widehat{OPT}| \leq O\left(\sqrt{\log K} \left(\min\left(\frac{1}{k^2}, e^{-(k-1)\sqrt{\frac{\sigma_{\min}}{\sigma_{\max}}}}\right) + f(k) \max\left(\frac{d^{k/2}}{s^{k/2}}, 1\right) \sqrt{\frac{d+n}{n^2}}\right)^{1/2}\right),$$

where  $f(k) = k^{O(k)}$ .

Choosing the optimal  $k$  in Theorem 5 yields the following Corollary 7 on the overall sample complexity in the unknown covariance setting.

**Corollary 7.** *For any  $\epsilon > \frac{\sqrt{\log K}}{d^{1/4}}$ , with probability  $1 - \delta$ , Algorithm 1 estimates the optimal reward  $OPT$  with additive error  $\epsilon$  using a total number of  $T = \Theta\left(\log(K/\delta) \max(k^{O(1)} d^{1-1/k} K^{2/k}, \frac{k^{O(k)} K \log K \sqrt{d}}{\epsilon^2})\right)$  samples, where  $k = \min(C_1 \sqrt{\log K} / \epsilon + 2, \sqrt{\frac{\sigma_{\max}}{\sigma_{\min}} (\log(\log K / \epsilon^2) + C_2)})$  for universal constants  $C_1, C_2$ .*

In the next two sections, we describe our estimators for  $H$  in the known covariance settings. The details of Algorithm 3 for the unknown covariance setting can be found in the appendix.

## 4.2 Estimating $H$ in the Known Covariance Setting

In this section, we show that the output of Algorithm 2 satisfies Proposition 2 and Proposition 3. As stated earlier, we assume  $\Sigma = I$  and  $\mathbf{E}[\mathbf{x}] = 0$  in this section.

To bound the estimation error of  $H$ , first observe that  $\hat{H}_{a,a} = \frac{\mathbf{y}_a^T A_{up} \mathbf{y}_a}{\binom{n}{2}}$  computed in Algorithm 2 is equal to  $\frac{1}{\binom{n}{2}} \sum_{i < j} y_{a,i} y_{a,j} \mathbf{x}_{a,i}^T \mathbf{x}_{a,j}$ . The following proposition on the estimation error of  $\hat{H}_{a,a}$  is a restatement of Proposition 4 in Kong and Valiant (2018).

**Proposition 2** (Restatement of Proposition 4 in Kong and Valiant (2018)). *For each arm  $a$ , define  $\hat{H}_{a,a} = \frac{1}{\binom{n}{2}} \sum_{i < j} y_{a,i} y_{a,j} \mathbf{x}_{a,i}^T \mathbf{x}_{a,j}$  and  $H_{a,a} = \beta_a^T \beta_a$ . Then  $\mathbf{E}[\hat{H}_{a,a}] = H_{a,a}$  and  $\mathbf{E}[(\hat{H}_{a,a} - H_{a,a})^2] \leq \frac{9d+3n}{n^2} \sigma_a^4$ .*

---

**Algorithm 2** Estimating  $\beta_a^T \beta_{a'}$ , Identity covariance [Proposition 2, Proposition 3]

---

1: **Input:**  $X_1 = [\mathbf{x}_{1,1}^\top, \dots, \mathbf{x}_{1,n}^\top]^\top, \dots, X_K = [\mathbf{x}_{K,1}^\top, \dots, \mathbf{x}_{K,n}^\top]^\top, \mathbf{y}_1 = [y_{1,1}, \dots, y_{1,n}]^\top, \dots, \mathbf{y}_K = [y_{K,1}, \dots, y_{K,n}]^\top$

2: **for**  $a = 1$  **to**  $K$  **do**

3:  $A \leftarrow (X_a X_a^T)_{up}$  where  $(X_a X_a^T)_{up}$  is the matrix  $X_a X_a^T$  with the diagonal and lower triangular entries set to zero.

4:  $\hat{H}_{a,a} \leftarrow \mathbf{y}_a^T A_{up} \mathbf{y}_a / \binom{n}{2}$ .

5: **for**  $a' = a + 1$  **to**  $K$  **do**

6:  $\hat{H}_{a,a'} \leftarrow \mathbf{y}_a^T X_a X_{a'}^T \mathbf{y}_{a'} / \binom{n}{2}$ .

7:  $\hat{H}_{a',a} \leftarrow \hat{H}_{a,a'}$ .

8: **end for**

9: **end for**

10: **Output:**  $\hat{H}$ .

---

The estimate  $\hat{H}_{a,a'} = \mathbf{y}_a^T X_a X_{a'}^T \mathbf{y}_{a'} / \binom{n}{2}$  computed in Algorithm 2 is equivalent to  $\frac{1}{n^2} \sum_{i,j} y_{a,i} y_{a',j} \mathbf{x}_{a,i}^T \mathbf{x}_{a',j}$ , and the following proposition bounds the estimation error of  $\hat{H}_{a,a'}$  for  $a \neq a'$ .

**Proposition 3.** For a pair of arms  $a, a'$ , define  $\hat{H}_{a,a'} = \frac{1}{n^2} \sum_{i,j} y_{a,i} y_{a',j} \mathbf{x}_{a,i}^T \mathbf{x}_{a',j}$  and  $H_{a,a'} = \beta_a^T \beta_{a'}$ . Then  $\mathbf{E}[\hat{H}_{a,a'}] = H_{a,a'}$  and  $\mathbf{E}[(\hat{H}_{a,a'} - H_{a,a'})^2] \leq \frac{9d+3n}{n^2} \sigma_a^2 \sigma_{a'}^2$ .

## 5 Experiments

We now provide some empirical indication of the benefit of our approach. In these experiments, we consider the known covariance setting. As long as prior data about contexts is available, as is often the case for consumer, health and many other applications, it would be possible to estimate the covariance in advance.

We first present results in a synthetic contextual multi-armed bandits setting. There are  $K = 5$  arms, and the input context vectors are drawn from a normal distribution with 0 mean and an identity covariance matrix. Our results are displayed in Figure 1 for context vectors of dimension 500, 2,000 and 50,000. Here our aim is to illustrate that we are able to estimate the optimal reward accurately after seeing significant fewer contexts than would be required by the standard alternative approach for contextual bandits which would try to estimate the optimal policy, and then estimate the performance of that policy. More precisely, in this setting we use the linear disjoint contextual bandits algorithm Li et al. (2010) to estimate the  $\beta$  and covariance for each arm (with an optimally chosen regularization parameter in the settings where  $n < d$ ). We then define the optimal policy as the best policy given those empirical estimates. We show the true

reward of this learned policy.

We also present results for a real-world setting that mimics a standard recommendation platform trying to choose which products to recommend to a user, given a high-dimensional featurization for that user. Our experiment is based on the Jester dataset (Goldberg et al., 2001). This is a well studied dataset which includes data for >70,000 individuals providing ratings for 100 jokes. We frame this as a multi-armed bandit setting by holding out the 10 most-rated jokes, and attempt to learn a policy to select which of these jokes to offer to a particular input user, based on a feature set that captures that user’s preferences based on the ratings for the remaining 90 jokes. We keep a set of 48447 users who each rated all of the 10 most popular jokes. For each person, we create a  $d = 2000$  dimensional feature vector by multiplying their 90-dimensional vector of joke ratings (with missing entries replaced by that user’s average rating) by a random  $90 \times 2000$  matrix (with i.i.d.  $N(0, 1)$  entries), and then applying a sigmoid to each of the resulting values. The reward is the user’s reported rating for the joke selected by the policy. We found that the optimal expected linear policy value using this featurization was 2.98 (out of a range of 0 to 5). For comparison, the same approach with  $d = 100$  has optimal policy with value 2.81, reflecting the fact that linear functions of the lower dimensional featurization cannot capture the preferences of the user as accurately as the higher dimensional featurization. Even for  $d = 2000$ , the full dataset of  $\approx 50,000$  people is sufficient to accurately estimate this “ground truth” optimal policy. Based on this  $d = 2000$  representation of the user’s context, we find that even with  $n = 500$  contexts, we can accurately estimate the optimal reward of the best threshold policy, to within about 0.1 accuracy, which improves significant for  $n \geq 1000$  (Figure 2). Note that this is significantly lower than we would need to compute any optimal policy.

We also evaluated our algorithm on NCI-60 Cancer Growth Inhibition dataset, where the cell growth inhibition effect is recorded for different types of chemical compounds tested on 60 different cancer cell lines with different concentration levels. We picked 26,555 types of chemicals that are tested on the NCI-H23 (non-small cell lung cancer) cell line with concentration level:  $-4, -5, -6, -7, -8 \log_{10}(\text{M})$ . We obtain the 1000-dimensional Morgan Fingerprints representation of each chemical from its SMILES representation using the Morgan algorithm implemented in RDKit. This is a standard method for featurizing chemical compounds. The task is to choose the most effective concentration level (among the five concentration levels) for the chemical compound, given the high-dimensional feature representation of the compound. We re-scaled the cancer

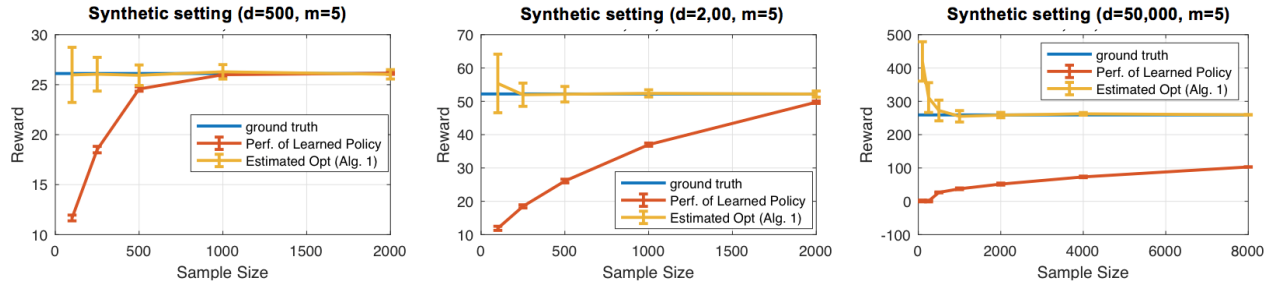

Figure 1: The three synthetic data plots depict our algorithm for estimating the optimal reward in a synthetic domain with dimension  $d = 500$  (left),  $d=2,000$  (center), and  $d = 50,000$  (right) in the setting with  $m = 5$  arms corresponding to independently chosen vectors  $\beta_1, \dots, \beta_5 \in \mathbb{R}^d$  with entries chosen independently from  $N(0, 1)$ . Our estimated value of the optimal reward is accurate when the sample size is significantly less than  $d$ , a regime where the best learned policy does not accurately represent the optimal policy. In each plot the blue line corresponds to the true reward of the optimal policy, and the red lines depicts the performance of the learned policy at that sample size using LinUCB.

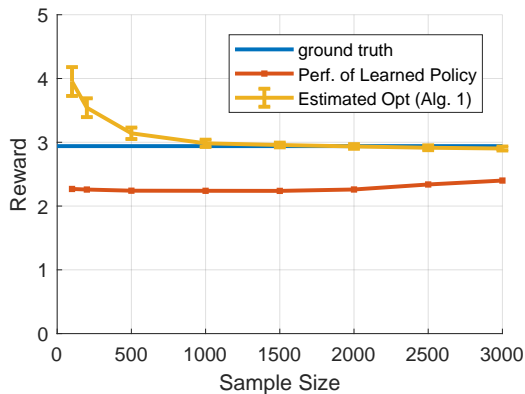

Figure 2: The plot depicts optimal reward estimation for a recommendation system that recommends 1 of 10 jokes (arms), where features are based on evaluations of 90 other jokes, represented in a  $d = 2000$  space.

inhibition effect as between 0 and 200, where 0 means no growth inhibition, 100 means completion growth inhibition, and 200 means the cancer cells are all dead. Figure 3 depicts the result of running our algorithm and LinUCB algorithm (Li et al., 2010). The blue line depicts the true reward (65.29) of the optimal policy estimated from all 26,555 datapoints. The red line depicts the average reward and confidence interval over the last 100 rounds by executing the LinUCB algorithm with  $\alpha = 1$  and different sample sizes. Notice that the LinUCB algorithm is fully adaptive and a given sample size  $n$  in Figure 3 actually corresponds to running the LinUCB algorithm for  $5n$  rounds. Unlike our algorithm which achieves an accurate estimate with roughly 500 samples per arm, LinUCB is unable to learn a good policy even with  $5 \times 4000 = 20000$  adaptive rounds. In this example, there is very little linear correlation between the features of the chemical compound and

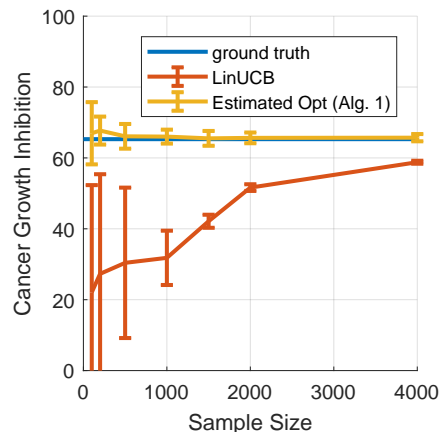

Figure 3: Evaluation on NCI-60 growth inhibition data. The blue line corresponds to the expected growth inhibition of the optimal policy. The red line is the reward and the confidence interval provided by LinUCB.

the inhibition effect, and simply always choosing the highest concentration achieves near-optimal reward. However, it takes thousands of rounds for the disjoint LinUCB algorithm to start playing near optimally.

## 6 Conclusion

To conclude, we present a promising approach for estimating the optimal reward in linear disjoint contextual bandits using a number of samples that is sublinear in the input contextual dimension. Without further assumptions, a linear number of samples is required to output a single potentially optimal policy. There exist many interesting directions for future work, including considering more generic contextual bandit settings with an infinite set of arms.



## Acknowledgments

The contributions of Weihao Kong and Gregory Valiant were partially supported by a Google Faculty Fellowship, an Amazon Faculty Fellowship, and by NSF award 1704417 and an ONR Young Investigator award. Emma Brunskill was supported in part by a NSF CAREER award.

## References

- A. Agarwal, D. Hsu, S. Kale, J. Langford, L. Li, and R. Schapire. Taming the monster: A fast and simple algorithm for contextual bandits. In *International Conference on Machine Learning*, pages 1638–1646, 2014.
- S. Athey and S. Wager. Efficient policy learning. *arXiv preprint arXiv:1702.02896*, 2017.
- J. Audibert, S. Bubeck, and R. Munos. Best arm identification in multi-armed bandits. In *Conference on Learning Theory (COLT)*, 2010.
- P. Auer, N. C. Bianchi, and P. Fischer. Finite-time analysis of the multiarmed bandit problem. *Machine Learning*, 2002.
- S. Bubeck, R. Munos, and G. Stoltz. Pure exploration in multi-armed bandits problems. In *International Conference on Algorithmic Learning Theory*, 2009.
- S. Chatterjee. An error bound in the sudakov-ferniqne inequality. *arXiv preprint math/0510424*, 2005.
- W. Chu, L. Li, L. Reyzin, and R. Schapire. Contextual bandits with linear payoff functions. In *Proceedings of the Fourteenth International Conference on Artificial Intelligence and Statistics*, pages 208–214, 2011.
- E. Even-Dar, S. Mannor, and Y. Mansour. Action elimination and stopping conditions for the multi-armed bandit and reinforcement learning problems. *Journal of Machine Learning Research*, 2006.
- V. Gabillon, M. Ghavamzadeh, and A. Lazaric. Best arm identification: A unified approach to fixed budget and fixed confidence. In *Advances in Neural Information Processing Systems (NIPS)*, pages 3212–3220, 2012.
- C. Gelada and M. G. Bellemare. Off-policy deep reinforcement learning by bootstrapping the covariate shift. *AAAI*, 2019.
- K. Goldberg, T. Roeder, D. Gupta, and C. Perkins. Eigentaste: A constant time collaborative filtering algorithm. *information retrieval*, 4(2):133–151, 2001.
- K. Greenewald, A. Tewari, S. Murphy, and P. Klasnja. Action centered contextual bandits. In *Advances in neural information processing systems*, pages 5977–5985, 2017.
- M. Hoffman, B. Shahriari, and N. Freitas. On correlation and budget constraints in model-based bandit optimization with application to automatic machine learning. In *Artificial Intelligence and Statistics*, pages 365–374, 2014.
- K. Jamieson, M. Malloy, R. Nowak, and S. Bubeck. lil’ucb: An optimal exploration algorithm for multi-armed bandits. In *Conference on Learning Theory (COLT)*, pages 423–439, 2014.
- G. Kamath. Bounds on the expectation of the maximum of samples from a gaussian. URL [http://www.gautamkamath.com/writings/gaussian\\_max.pdf](http://www.gautamkamath.com/writings/gaussian_max.pdf), 2015.
- Z. Karnin, T. Koren, and O. Somekh. Almost optimal exploration in multi-armed bandits. In *International Conference on Machine Learning (ICML)*, 2013.
- R. Keramati and E. Brunskill. Value driven representation for human-in-the-loop reinforcement learning. In *Proceedings of the 27th ACM Conference on User Modeling, Adaptation and Personalization*, pages 176–180. ACM, 2019.
- W. Kong and G. Valiant. Estimating learnability in the sublinear data regime. *arXiv preprint arXiv:1805.01626*, 2018.
- A. S. Lan and R. G. Baraniuk. A contextual bandits framework for personalized learning action selection. In *EDM*, pages 424–429, 2016.
- T. Lattimore and C. Szepesvári. Bandit algorithms. *preprint*, page 28, 2018.
- L. Li, W. Chu, J. Langford, and R. E. Schapire. A contextual-bandit approach to personalized news article recommendation. In *Proceedings of the 19th international conference on World wide web*, pages 661–670. ACM, 2010.
- Y. Liu, A. Swaminathan, A. Agarwal, and E. Brunskill. Off-policy policy gradient with state distribution correction. *UAI*, 2019.
- T. Mandel, Y.-E. Liu, E. Brunskill, and Z. Popović. Where to add actions in human-in-the-loop reinforcement learning. In *Thirty-First AAAI Conference on Artificial Intelligence*, 2017.
- O. Maron and A. W. Moore. Hoeffding races: Accelerating model selection search for classification and function approximation. In *Advances in Neural Information Processing Systems (NIPS)*, pages 59–66, 1994.
- V. Mnih, C. Szepesvári, and J.-Y. Audibert. Empirical bernstein stopping. In *International Conference on Machine Learning (ICML)*, pages 672–679. ACM, 2008.

- M. Soare, A. Lazaric, and R. Munos. Best-arm identification in linear bandits. In *Advances in Neural Information Processing Systems*, pages 828–836, 2014.
- P. Thomas, G. Theodorou, and M. Ghavamzadeh. High confidence policy improvement. In *International Conference on Machine Learning*, pages 2380–2388, 2015.
- A. B. Tsybakov. *Introduction to Nonparametric Estimation*. Springer Publishing Company, Incorporated, 1st edition, 2008. ISBN 0387790519, 9780387790510.
- R. Vershynin. Introduction to the non-asymptotic analysis of random matrices. *arXiv preprint arXiv:1011.3027*, 2010.
- L. Xu, J. Honda, and M. Sugiyama. A fully adaptive algorithm for pure exploration in linear bandits. In *International Conference on Artificial Intelligence and Statistics*, pages 843–851, 2018.
- L. Zhou and E. Brunskill. Latent contextual bandits and their application to personalized recommendations for new users. In *Proceedings of the Twenty-Fifth International Joint Conference on Artificial Intelligence*, pages 3646–3653. AAAI Press, 2016.

## A Proof of Proposition 1

*Proof of Proposition 1.* The following lemma is a restatement of Theorem 1.2 of Chatterjee (2005) which bound the change of the expected maximum by the entry-wise perturbation of the covariance matrix.

**Lemma 1** (Theorem 1.2 of Chatterjee (2005)). *Let  $H \in R^{K \times K}$ ,  $H' \in R^{K \times K}$  be two PSD matrices, and  $\mathbf{b} \in R^K$  be a  $K$ -dimensional real vector. Let  $\gamma = \max_{i,j} |H_{i,j} - H'_{i,j}|$ , then*

$$|\mathbf{E}_{\mathbf{x} \sim N(\mathbf{b}, H)}[\max_i x_i] - \mathbf{E}_{\mathbf{x} \sim N(\mathbf{b}, H')}[\max_i x_i]| \leq 2\sqrt{\gamma \log K}.$$

Lemma 1 handles the perturbation of the covariance matrix. The following simple proposition handles the perturbation of the mean, which, combined with Lemma 1, immediately implies the statement of our proposition.

**Lemma 2.** *Let  $H \in R^{K \times K}$  be a PSD matrices, and  $\mathbf{b}, \mathbf{b}' \in R^K$  be two  $K$ -dimensional real vectors. Then*

$$|\mathbf{E}_{\mathbf{x} \sim N(\mathbf{b}, H)}[\max_i x_i] - \mathbf{E}_{\mathbf{x} \sim N(\mathbf{b}', H)}[\max_i x_i]| \leq \max_i |b_i - b'_i|.$$

*Proof of Lemma 2.* Let  $\mathbf{x} \sim N(\mathbf{b}, H)$  and  $\mathbf{x}' = \mathbf{x} + \mathbf{b}' - \mathbf{b}$ . Then the random vector  $\mathbf{x}'$  follows from  $N(\mathbf{b}', H)$ . We have

$$|\mathbf{E}[\max_i x_i] - \mathbf{E}[\max_i x'_i]| \leq \mathbf{E}[|\max_i x_i - \max_i x'_i|] \leq \max_i |b_i - b'_i|,$$

which concludes the proof.  $\square$

Combining the two lemma, we have that

$$|\mathbf{E}_{\mathbf{x} \sim N(\mathbf{b}, H)}[\max_i x_i] - \mathbf{E}_{\mathbf{x} \sim N(\mathbf{b}', H')}[\max_i x_i]| \leq 2\sqrt{\max_{i,j} |H_{i,j} - H'_{i,j}| \log K} + \max_i |b_i - b'_i|,$$

which concludes the proof.  $\square$

## B Proofs of the Upper Bounds in the Known Covariance Setting

*Proof of Proposition 3.* We need the following fact about the 4-th moment of Gaussian distribution in the proof of this proposition.

**Fact 1.** *Let  $\mathbf{x} \sim N(0, I_d)$ .  $\mathbf{E}[(\mathbf{u}^T \mathbf{x})^2 (\mathbf{v}^T \mathbf{x})^2] = \|\mathbf{u}\|^2 \|\mathbf{v}\|^2 + 2(\mathbf{u}^T \mathbf{v})^2 \leq 3\|\mathbf{u}\|^2 \|\mathbf{v}\|^2$*

It's easy to verify that  $\mathbf{E}[\hat{H}_{a,a'}] = H_{a,a'}$ .  $\mathbf{E}[(\hat{H}_{a,a'} - H_{a,a'})^2]$  can be expressed as

$$\begin{aligned} & \frac{1}{n^4} \sum_{i,j,i',j'} (\mathbf{E}[y_{a,i} y_{a',j} y_{a,i'} y_{a',j'} \mathbf{x}_{a,i}^T \mathbf{x}_{a',j} \mathbf{x}_{a,i'}^T \mathbf{x}_{a',j'}] \\ & - \mathbf{E}[y_{a,i} y_{a',j} \mathbf{x}_{a,i}^T \mathbf{x}_{a',j}] \mathbf{E}[y_{a,i'} y_{a',j'} \mathbf{x}_{a,i'}^T \mathbf{x}_{a',j'}]). \end{aligned}$$

For each term in the summation, we classify it into one of the 3 different cases according to  $i, j, i', j'$ :

1. If  $i \neq i'$  and  $j \neq j'$ , the term is 0, simply because  $y_{a,i} y_{a',j} \mathbf{x}_{a,i}^T \mathbf{x}_{a',j}$  is independent of  $y_{a,i'} y_{a',j'} \mathbf{x}_{a,i'}^T \mathbf{x}_{a',j'}$ .
2. If  $i = i'$  and  $j \neq j'$ , the term can then be expressed as:

$$\begin{aligned} & \mathbf{E}[y_{a,i}^2 y_{a',j} y_{a',j'} \mathbf{x}_{a,i}^T \mathbf{x}_{a',j} \mathbf{x}_{a,i}^T \mathbf{x}_{a',j'}] - (\beta_a^T \beta_{a'})^2 \\ & = \mathbf{E}[y_{a,i}^2 (\beta_{a'}^T \mathbf{x}_{a,i})^2] - (\beta_a^T \beta_{a'})^2 \\ & \leq \mathbf{E}[(\beta_a \mathbf{x}_{a,i})^2 (\beta_{a'} \mathbf{x}_{a,i})^2] + \mathbf{E}[\eta_{a,i}^2] \|\beta_{a'}\|^2 - (\beta_a^T \beta_{a'})^2 \\ & = \|\beta_a\|^2 \|\beta_{a'}\|^2 + (\beta_a \beta_{a'}^T)^2 + \mathbf{E}[\eta_{a,i}^2] \|\beta_{a'}\|^2 \tag{2} \\ & \leq 3\sigma_a^2 \sigma_{a'}^2, \tag{3} \end{aligned}$$

where Equation 2 follows from Fact 1 and Equation 3 follows from the fact that  $\|\beta_a\|^2 + \mathbf{E}[\eta_{a,i}^2] \leq \sigma_a^2$ ,  $\|\beta_{a'}\|^2 + \mathbf{E}[\eta_{a,i}^2] \leq \sigma_{a'}^2$ .

3. If  $i \neq i'$  and  $j = j'$ , this case is symmetric to the last case and  $3\sigma_a^2\sigma_{a'}^2$  is an upper bound.
4. If  $i = i'$  and  $j = j'$ , the term can then be expressed as:

$$\mathbf{E}[y_{a,i}^2 y_{a',j}^2 (\mathbf{x}_{a,i}^T \mathbf{x}_{a',j})^2] - (\beta_a^T \beta_{a'})^2.$$

First taking the expectation over  $\mathbf{x}_{a',j}, y_{a',j}$  and applying Fact 1, we have the term upper bound by

$$\begin{aligned} &\leq \mathbf{E}[y_{a,i}^2 y_{a',j}^2 (\mathbf{x}_{a,i}^T \mathbf{x}_{a',j})^2] \\ &\leq 3\mathbf{E}[y_{a,i}^2 (\mathbf{x}_{a,i}^T \mathbf{x}_{a,i})] \sigma_{a'}^2. \end{aligned}$$

Using the fact that  $\mathbf{x}_{a,i}^T \mathbf{x}_{a,i} = \sum_{l=1}^d (\mathbf{e}_j^T \mathbf{x}_{a,i})^2$  we have

$$\begin{aligned} &3\sigma_{a'}^2 \sum_{l=1}^d \mathbf{E}[y_{a,i}^2 (\mathbf{e}_j^T \mathbf{x}_{a,i})^2] \\ &\leq 3\sigma_{a'}^2 \sum_{l=1}^d (3\|\beta_a\|^2 + \mathbf{E}[\eta_{a,i}^2]) \\ &\leq 9d\sigma_a^2\sigma_{a'}^2, \end{aligned} \tag{4}$$

where we have applied Fact 1 in Equation 4.

The final step is to sum the contributions of these 3 cases. Case 2 and 3 have  $4\binom{n}{3}$  different quadruples  $(i, j, i', j')$ . Case 4 has  $\binom{n}{2}$  different quadruples  $(i, j, i', j')$ . Combining the resulting bounds yields:  $\frac{1}{n^4} \sum_{i,j,i',j'} (\mathbf{E}[y_{a,i} y_{a',j} y_{a,i'} y_{a',j'} \mathbf{x}_{a,i}^T \mathbf{x}_{a',j} \mathbf{x}_{a,i'}^T \mathbf{x}_{a',j'}] - \mathbf{E}[y_{a,i} y_{a',j} \mathbf{x}_{a,i}^T \mathbf{x}_{a',j}] \mathbf{E}[y_{a,i'} y_{a',j'} \mathbf{x}_{a,i'}^T \mathbf{x}_{a',j'}]) \leq \frac{3n+9d}{n^2} \sigma_a^2 \sigma_{a'}^2$ .  $\square$

*Proof of Theorem 4.* Applying Fact 11 on top of Corollary 5, we have that for a fixed  $i, j$ , with probability at least  $1 - \exp(-\log(K^2/\delta) - 1) \geq 1 - \delta/(K^2 + K)$ , the median estimates  $\hat{H}$  of Algorithm 1 satisfies  $|\hat{H}_{i,j} - H_{i,j}| \leq 3\sqrt{\frac{9d+3n}{n^2}} \sigma_i \sigma_j$ . We define  $\bar{\sigma}$  such that  $\sigma_i \leq \bar{\sigma}$  for all  $i$ . Applying Fact 11 with Corollary 4, we get that for a fixed  $i$ , with probability at least  $1 - \exp(-\log(K^2/\delta) - 1) \geq 1 - \delta/(K^2 + K)$ , the median estimates  $\hat{\mathbf{b}}$  of Algorithm 1 satisfies  $|\hat{b}_i - b_i| \leq 3\sqrt{\frac{1}{n}} \sigma_i$ . Hence by a union bound, we have that with probability at least  $1 - \delta$ ,  $\hat{H}$  and  $\hat{\mathbf{b}}$  satisfy

$$\max_{i,j} |\hat{H}_{i,j} - H_{i,j}| \leq 3\sqrt{\frac{9d+3n}{n^2}} \bar{\sigma}^2,$$

$$\max_i |\hat{b}_i - b_i| \leq 3\sqrt{\frac{1}{n}} \bar{\sigma}.$$

In order to bound the discrepancy between  $\hat{H}^{(PSD)}$  and  $H$ , notice that by the optimality of  $\hat{H}^{(PSD)}$ , there is  $\max |\hat{H}_{i,j}^{(PSD)} - \hat{H}_{i,j}| \leq \max |H_{i,j} - \hat{H}_{i,j}|$ . Applying triangle inequality, we have

$$\begin{aligned} &\max |\hat{H}_{i,j}^{(PSD)} - H_{i,j}| \\ &\leq \max |\hat{H}_{i,j}^{(PSD)} - \hat{H}_{i,j}| + \max |H_{i,j} - \hat{H}_{i,j}| \\ &\leq 6\sqrt{\frac{9d+3n}{n^2}} \bar{\sigma}^2 \end{aligned}$$

Thus, by Proposition 1, with probability  $1 - \delta$  the final estimation error is bounded by

$$\begin{aligned} |OPT - \widehat{OPT}| &\leq 7\sqrt{\log K} \left(\frac{3d+n}{n^2}\right)^{1/4} \bar{\sigma} + 3\frac{1}{\sqrt{n}} \bar{\sigma} \\ &\leq 10\sqrt{\log K} \left(\frac{3d+n}{n^2}\right)^{1/4} \bar{\sigma} \\ &= O(\sqrt{\log K} \left(\frac{d+n}{n^2}\right)^{1/4}), \end{aligned}$$

where we have apply the fact that  $\bar{\sigma}$  is a constant.  $\square$

Corollary 1 follows immediately from Theorem 4.

*Proof of Corollary 1.* In order to achieve additive error  $\epsilon$ , we set  $n = \Theta(\frac{\log K}{\epsilon^2} \max(\sqrt{d}, \frac{\log K}{\epsilon^2})) = \Theta(\frac{\sqrt{d} \log K}{\epsilon^2})$  where the last equality holds by Theorem 4 and the assumption on  $\epsilon$ . Algorithm 1 in total requires  $T = \Theta(nK(\log K + \log(1/\delta))) = \Theta(\frac{\sqrt{d}K \log K}{\epsilon^2}(\log K + \log(1/\delta)))$  samples.  $\square$

## C Algorithm for Estimating $H$ in the Unknown Covariance Setting

In this section, we present the algorithm for estimating  $H$  in the unknown covariance setting and its main proposition. We assume each context  $\mathbf{x}_{a,i}$  of the input of Algorithm 3 is drawn from  $N(0, \Sigma)$ .

---

**Algorithm 3** Estimating  $\beta_a^T \Sigma \beta_{a'}$ , General covariance [Proposition 4]

---

- 1: **Input:**  $X_1 = [\mathbf{x}_{1,1}^\top, \dots, \mathbf{x}_{1,n}^\top]^\top, \dots, X_K = [\mathbf{x}_{K,1}^\top, \dots, \mathbf{x}_{K,n}^\top]^\top, \mathbf{y}_1 = [y_{1,1}, \dots, y_{1,n}]^\top, \dots, \mathbf{y}_K = [y_{K,1}, \dots, y_{K,n}]^\top$ , unlabeled examples  $X = [\mathbf{x}_1^\top, \dots, \mathbf{x}_s^\top]^\top$  and degree  $k+2$  polynomial  $p(x) = \sum_{i=0}^k a_i x^{i+2}$  that approximates the function  $f(x) = x$  for all  $x \in [\sigma_{\min}, \sigma_{\max}]$ , where  $\sigma_{\min}$  and  $\sigma_{\max}$  are the minimum and maximum singular values of the covariance of the distribution from which the  $\mathbf{x}_i$ 's are drawn.
  - 2:  $G \leftarrow (XX^T)_{up}$  where  $(XX^T)_{up}$  is the matrix  $XX^T$  with the diagonal and lower triangular entries set to zero.
  - 3:  $P \leftarrow a_0 I_d + \sum_{t=1}^k \binom{a_t}{s} X^T G^{t-1} X$ .
  - 4: **for**  $i = 1$  **to**  $m$  **do**
  - 5:      $\hat{H}_{a,a} \leftarrow \mathbf{y}_a^T (X_a P X_a^T)_{up} \mathbf{y}_a / \binom{n}{2}$ .
  - 6:     **for**  $a' = a + 1$  **to**  $m$  **do**
  - 7:          $\hat{H}_{a,a'} \leftarrow \mathbf{y}_a^T X_a P X_{a'}^T \mathbf{y}_{a'} / n^2$ .
  - 8:     **end for**
  - 9: **end for**
  - 10: **Output:**  $\hat{H}$ .
- 

## D Proofs of the Upper Bounds in the Unknown Covariance Setting

The following is the main proposition for Algorithm 3. Note  $\frac{1}{\binom{n}{2}} \mathbf{y}_a^T (X_a X_a^T)_{up} \mathbf{y}_a$  is an unbiased estimator of  $\beta_a^T \Sigma^2 \beta_a$ , and  $\frac{1}{n^2} \mathbf{y}_a^T X_a X_a^T \mathbf{y}_{a'}$  is an unbiased estimator of  $\beta_a^T \Sigma^2 \beta_{a'}$ . As in Algorithm 3, define  $G = (XX^T)_{up}$  where  $(XX^T)_{up}$  is the matrix  $XX^T$  with the diagonal and lower triangular entries set to zero. For any  $t \geq 1$ ,  $\frac{1}{\binom{n}{2}} \mathbf{y}_a^T (X_a \frac{X^T G^{t-1} X}{\binom{s}{t}} X_a^T)_{up} \mathbf{y}_a$  is an unbiased estimator of  $\beta_a^T \Sigma^{2+t} \beta_a$ , and  $\frac{1}{n^2} \mathbf{y}_a^T X_a \frac{X^T G^{t-1} X}{\binom{s}{t}} X_{a'}^T \mathbf{y}_{a'}$  is an unbiased estimator of  $\beta_a^T \Sigma^{2+t} \beta_{a'}$ . Proposition 3 of Kong and Valiant (2018) provides a degree  $k$  polynomial with approximation error  $\min(\frac{2}{k^2}, 2e^{-1(k-1)\sqrt{\frac{\sigma_{\min}}{\sigma_{\max}}}})$  in the interval  $[\sigma_{\min}, \sigma_{\max}]$ . Given accurate estimation of  $\beta_a^T \Sigma^2 \beta_a, \beta_a^T \Sigma^3 \beta_a, \beta_a^T \Sigma^4 \beta_a, \dots$ , one can linearly combine these estimates to approximate  $\beta_a \Sigma \beta_a$  where the coefficients correspond to the coefficients of  $x^2, x^3, x^4, \dots$  in the polynomial provided by Proposition 3 of Kong and Valiant (2018). We plug in such a polynomial to Algorithm 3 and obtain the following proposition on the approximation of diagonal entry  $H_{a,a} = \beta_a \Sigma \beta_a$  and off-diagonal entry  $H_{a,a'} = \beta_a \Sigma \beta_{a'}$ .

**Proposition 4.** *Let  $p(x)$  be a degree  $k+2$  polynomial  $p(x) = \sum_{i=0}^k a_i x^{i+2}$  that approximates the function  $f(x) = x$  for all  $x \in [\sigma_{\min}, \sigma_{\max}]$ , where  $\sigma_{\min} I_d \preceq \Sigma \preceq I_d \sigma_{\max}$ . Let  $G = (XX^T)_{up}$  where  $(XX^T)_{up}$  is the matrix  $XX^T$  with the diagonal and lower triangular entries set to zero, and  $P = a_0 I_d + \sum_{t=1}^k \binom{a_t}{s} X^T G^{t-1} X$  be the matrix  $P$  defined in Algorithm 3. We have that for any  $a \neq a'$ ,*

$$\begin{aligned} & \mathbf{E} \left[ \left( \frac{\mathbf{y}_a^T (X_a P X_a^T)_{up} \mathbf{y}_a}{\binom{n}{2}} - \beta_a \Sigma \beta_a \right)^2 \right] \\ & \leq \min \left( \frac{4}{k^4}, 4e^{-2(k-1)\sqrt{\frac{\sigma_{\min}}{\sigma_{\max}}}} \right) + f(k) \max \left( \frac{d^k}{s^k}, 1 \right) \frac{d+n}{n^2}, \end{aligned}$$

and

$$\begin{aligned} & \mathbf{E}\left[\left(\frac{\mathbf{y}_a^T X_a P X_{a'}^T \mathbf{y}_{a'}}{n^2} - \beta_a \Sigma \beta_{a'}\right)^2\right] \\ & \leq \min\left(\frac{4}{k^4}, 4e^{-2(k-1)\sqrt{\frac{\sigma_{\min}}{\sigma_{\max}}}}\right) + f(k) \max\left(\frac{d^k}{s^k}, 1\right) \frac{d+n}{n^2}, \end{aligned}$$

for  $f(k) = k^{O(k)}$ .

### D.1 Proof of Proposition 4, Estimating $H$ in the Unknown Covariance Setting.

In order to prove Proposition 4, we first prove Proposition 5 and Proposition 6, where Proposition 5 gives a variance bound for our estimator of  $\beta_a \Sigma^{k+2} \beta_a$  for  $k \geq 0$ , and Proposition 6 gives a variance bound for our estimator of  $\beta_a \Sigma^{k+2} \beta_{a'}$  for  $k \geq 0$ . Then Proposition 4 holds by combining the two propositions.

**Proposition 5.** For arm  $a$ , We denote  $\{\mathbf{x}_i\}$  as a set of unlabeled examples, where  $|\mathbf{x}_i| = s$ .

$$\begin{aligned} & \mathbf{E}\left[\frac{1}{\binom{s}{k}\binom{n}{2}} \sum_{i < j} y_{a,i} y_{a,j} \mathbf{x}_{a,i}^T \left( \sum_{i_1 < i_2 < \dots < i_k} \mathbf{x}_{i_1} \mathbf{x}_{i_1}^T \mathbf{x}_{i_2} \mathbf{x}_{i_2}^T \dots \mathbf{x}_{i_k} \mathbf{x}_{i_k}^T \right) \mathbf{x}_{a,j}\right] = \beta_a^T \Sigma^{k+2} \beta_a \\ & \text{Var}\left[\frac{1}{\binom{s}{k}\binom{n}{2}} \sum_{i < j} y_{a,i} y_{a,j} \mathbf{x}_{a,i}^T \left( \sum_{i_1 < i_2 < \dots < i_k} \mathbf{x}_{i_1} \mathbf{x}_{i_1}^T \mathbf{x}_{i_2} \mathbf{x}_{i_2}^T \dots \mathbf{x}_{i_k} \mathbf{x}_{i_k}^T \right) \mathbf{x}_{a,j}\right] = f(k) \max\left(\frac{d^k}{s^k}, 1\right) \frac{d+n}{n^2}, \end{aligned}$$

where  $f(k) = k^{O(k)}$

*Proof.* Notice that for  $i < j$ ,  $y_{a,i} y_{a,j} \mathbf{x}_{a,i}^T \left( \sum_{i_1 < i_2 < \dots < i_k} \mathbf{x}_{i_1} \mathbf{x}_{i_1}^T \mathbf{x}_{i_2} \mathbf{x}_{i_2}^T \dots \mathbf{x}_{i_k} \mathbf{x}_{i_k}^T \right) \mathbf{x}_{a,j}$  is an unbiased estimator for  $\beta_a^T \Sigma^{k+2} \beta_a$ . Since the average of unbiased estimators is still an unbiased estimator, the proposition statement about the expectation holds. We write the variance of the estimator as follows,

$$\frac{1}{\binom{n}{2}} \sum_{i < j, i' < j'} \left( \mathbf{E}[y_{a,i} y_{a,j} \mathbf{x}_{a,i}^T \left( \frac{1}{\binom{s}{k}} \sum_{i_1 < i_2 < \dots < i_k} \mathbf{x}_{i_1} \mathbf{x}_{i_1}^T \mathbf{x}_{i_2} \mathbf{x}_{i_2}^T \dots \mathbf{x}_{i_k} \mathbf{x}_{i_k}^T \right) \mathbf{x}_{a,j} y_{a,i'} y_{a,j'} \mathbf{x}_{a,i'}^T \right] \quad (5)$$

$$\left( \frac{1}{\binom{s}{k}} \sum_{i_1 < i_2 < \dots < i_k} \mathbf{x}_{i_1} \mathbf{x}_{i_1}^T \mathbf{x}_{i_2} \mathbf{x}_{i_2}^T \dots \mathbf{x}_{i_k} \mathbf{x}_{i_k}^T \right) \mathbf{x}_{a,j'} - (\beta_a^T \Sigma^{k+2} \beta_a)^2 \right) \quad (6)$$

$$= \frac{1}{\binom{n}{2}} \sum_{i < j, i' < j'} \left( \mathbf{E}[y_{a,i} y_{a,j} \mathbf{x}_{a,i}^T \left( \frac{1}{\binom{s}{k}} \sum_{i_1 < i_2 < \dots < i_k} \mathbf{x}_{i_1} \mathbf{x}_{i_1}^T \mathbf{x}_{i_2} \mathbf{x}_{i_2}^T \dots \mathbf{x}_{i_k} \mathbf{x}_{i_k}^T \right) \mathbf{x}_{a,j} y_{a,i'} y_{a,j'} \mathbf{x}_{a,i'}^T \right] \quad (7)$$

$$\left( \frac{1}{\binom{s}{k}} \sum_{i_1 < i_2 < \dots < i_k} \mathbf{x}_{i_1} \mathbf{x}_{i_1}^T \mathbf{x}_{i_2} \mathbf{x}_{i_2}^T \dots \mathbf{x}_{i_k} \mathbf{x}_{i_k}^T \right) \mathbf{x}_{a,j'} - y_{a,i} y_{a,j} \mathbf{x}_{a,i}^T \Sigma^k \mathbf{x}_{a,j} y_{a,i'} y_{a,j'} \mathbf{x}_{a,i'}^T \Sigma^k \mathbf{x}_{a,j'} \right] \quad (8)$$

$$+ \mathbf{E}[y_{a,i} y_{a,j} \mathbf{x}_{a,i}^T \Sigma^k \mathbf{x}_{a,j} y_{a,i'} y_{a,j'} \mathbf{x}_{a,i'}^T \Sigma^k \mathbf{x}_{a,j'}] - (\beta_a^T \Sigma^{k+2} \beta_a)^2. \quad (9)$$

For each term in the summation, we classify it into one of the 3 different cases according to  $i, j, i', j'$ :

1. If  $i \neq i'$  and  $j \neq j'$ , the term is 0.
2. If  $i = i'$  and  $j \neq j'$ , the term can be written as  $\mathbf{E}[y_{a,i}^2 \mathbf{x}_{a,i}^T \left( \sum_{i_1 < i_2 < \dots < i_k} \mathbf{x}_{i_1} \mathbf{x}_{i_1}^T \mathbf{x}_{i_2} \mathbf{x}_{i_2}^T \dots \mathbf{x}_{i_k} \mathbf{x}_{i_k}^T \right) \Sigma \beta \mathbf{x}_{a,i}^T \left( \sum_{i_1 < i_2 < \dots < i_k} \mathbf{x}_{i_1} \mathbf{x}_{i_1}^T \mathbf{x}_{i_2} \mathbf{x}_{i_2}^T \dots \mathbf{x}_{i_k} \mathbf{x}_{i_k}^T \right) \Sigma \beta - y_{a,i}^2 \mathbf{x}_{a,i}^T \Sigma^{k+1} \beta \mathbf{x}_{a,i}^T \Sigma^{k+1} \beta] + \mathbf{E}[y_{a,i}^2 \mathbf{x}_{a,i}^T \Sigma^{k+1} \beta \mathbf{x}_{a,i}^T \Sigma^{k+1} \beta] - (\beta_a^T \Sigma^{k+2} \beta_a)^2$ . By Lemma 2 of Kong and Valiant (2018), the first expectation is bounded by  $f(k) \max(\frac{d^{k-1}}{s^k}, \frac{1}{s}) \mathbf{E}[y_{a,i}^2 \mathbf{x}_{a,i}^T \mathbf{x}_{a,i}] = O(f(k) \max(\frac{d^k}{s^k}, \frac{d}{s}))$ , and the second difference is bounded by constant by the four moment condition of Gaussian.
3. If  $i \neq i'$  and  $j = j'$ , this case is symmetric to case 2.

4. If  $i = i'$  and  $j = j'$ , the term can be written as  $\mathbf{E}[y_{a,i}^2 y_{a,j}^2 \mathbf{x}_{a,i}^T (\sum_{i_1 < i_2 < \dots < i_k} \mathbf{x}_{i_1} \mathbf{x}_{i_1}^T \mathbf{x}_{i_2} \mathbf{x}_{i_2}^T \dots \mathbf{x}_{i_k} \mathbf{x}_{i_k}^T) \mathbf{x}_{a,j} \mathbf{x}_{a,i}^T (\sum_{i_1 < i_2 < \dots < i_k} \mathbf{x}_{i_1} \mathbf{x}_{i_1}^T \mathbf{x}_{i_2} \mathbf{x}_{i_2}^T \dots \mathbf{x}_{i_k} \mathbf{x}_{i_k}^T) \mathbf{x}_{a,j} - (y_{a,i} y_{a,j} \mathbf{x}_{a,i}^T \Sigma^k \mathbf{x}_{a,j})^2] + \mathbf{E}[(y_{a,i} y_{a,j} \mathbf{x}_{a,i}^T \Sigma^k \mathbf{x}_{a,j})^2] - (\beta_a^T \Sigma^{k+2} \beta_a)^2$ . By Lemma 2 of Kong and Valiant (2018), the first expectation is bounded by

$$f(k) \max\left(\frac{d^{k-1}}{s^k}, \frac{1}{s}\right) \mathbf{E}[y_{a,i}^2 \mathbf{x}_{a,i}^T \mathbf{x}_{a,i}] \mathbf{E}[y_{a,j}^2 \mathbf{x}_{a,j}^T \mathbf{x}_{a,j}] = O(f(k) d \max\left(\frac{d^k}{s^k}, \frac{d}{s}\right))$$

, and the second difference is bounded by  $O(d)$  by the four moment condition of Gaussian.

The final step is to sum the contributions of these 3 cases. Case 2 has  $O(n^3)$  different quadruples  $(i, j, i', j')$ . Case 4 has  $n^2$  different quadruples  $(i, j, i', j')$ . Combining the resulting bounds yields the following bound on the variance:  $\frac{1}{\binom{n}{2}^2} (n^3 \max(\frac{d^k}{s^k}, \frac{d}{s}, 1) + n^2 d \max(\frac{d^k}{s^k}, \frac{d}{s}, 1)) = f(k) \max(\frac{d^k}{s^k}, 1) \frac{d+n}{n^2}$ .  $\square$

**Proposition 6.** For arm  $a \neq a'$ , let  $\mu_a = \frac{\sum_j y_{a,j} \mathbf{x}_{a,j}}{n}$ ,  $\mu_{a'} = \frac{\sum_j y_{a',j} \mathbf{x}_{a',j}}{n}$ . We denote  $\{\mathbf{x}_i\}$  as a set of unlabeled examples, where  $|\mathbf{x}_i| = s$ .

$$\mathbf{E}\left[\frac{1}{\binom{s}{k}} \mu_a^T \left( \sum_{i_1 < i_2 < \dots < i_k} \mathbf{x}_{i_1} \mathbf{x}_{i_1}^T \mathbf{x}_{i_2} \mathbf{x}_{i_2}^T \dots \mathbf{x}_{i_k} \mathbf{x}_{i_k}^T \right) \mu_{a'}\right] = \beta_a^T \Sigma^{k+2} \beta_{a'}$$

$$\mathbf{Var}\left[\frac{1}{\binom{s}{k}} \mu_a^T \left( \sum_{i_1 < i_2 < \dots < i_k} \mathbf{x}_{i_1} \mathbf{x}_{i_1}^T \mathbf{x}_{i_2} \mathbf{x}_{i_2}^T \dots \mathbf{x}_{i_k} \mathbf{x}_{i_k}^T \right) \mu_{a'}\right] = f(k) \max\left(\frac{d^k}{s^k}, 1\right) \frac{d+n}{n^2},$$

where  $f(k) = k^{O(k)}$ .

*Proof.* Notice that  $\mathbf{E}[\mu_a] = \Sigma \beta_a$ . It's easy to see that

$$\mathbf{E}[\mu_a \mathbf{x}_{i_1} \mathbf{x}_{i_1}^T \dots \mathbf{x}_{i_k} \mathbf{x}_{i_k}^T \mu_{a'}] = \beta_a \Sigma^{k+2} \beta_{a'}.$$

For the variance bound, we can express the variance as the summation of the following two terms,

$$\mathbf{E}_{\mu_a, \mu_{a'}}[\mathbf{E}_{\mathbf{x}}\left[\left(\frac{1}{\binom{s}{k}} \mu_a^T \left( \sum_{i_1 < i_2 < \dots < i_k} \mathbf{x}_{i_1} \mathbf{x}_{i_1}^T \mathbf{x}_{i_2} \mathbf{x}_{i_2}^T \dots \mathbf{x}_{i_k} \mathbf{x}_{i_k}^T \right) \mu_{a'}\right)^2\right] - (\mu_a \Sigma^{k+2} \mu_{a'})^2]$$

$$+ \mathbf{E}_{\mu_a, \mu_{a'}}[(\mu_a \Sigma^k \mu_{a'})^2 - (\beta_a \Sigma^{k+2} \beta_{a'})^2].$$

The first term, by Lemma 2 of Kong and Valiant (2018) and Fact 3, is bounded by

$$f(k) \min\left(\frac{d^{k-1}}{s^k}, \frac{1}{s}\right) \mathbf{E}_{\mu_a, \mu_{a'}}[\|\mu_a\|^2 \|\mu_{a'}\|^2] \leq f(k) \max\left(\frac{d^{k-1}}{s^k}, \frac{1}{s}\right) \max\left(\frac{d^2}{n^2}, 1\right).$$

The second term, by Proposition 7, is bounded by  $O(\frac{d+n}{n^2})$ , and summing up the two bounds yields the desired variance bound.  $\square$

Before proving Proposition 4, we first briefly show that the quantity computed in Algorithm 3 is equivalent to the estimators appear in Proposition 5 and Proposition 6.

**Fact 2.** For any  $t \geq 1$ ,  $\frac{1}{\binom{n}{2}} \mathbf{y}_a^T (X_a \frac{X^T G^{t-1} X}{\binom{s}{t}} X_a^T)_{up} \mathbf{y}_a = \beta_a^T \Sigma^{2+t} \beta_a$  and  $\frac{1}{n^2} \mathbf{y}_a^T X_a \frac{X^T G^{t-1} X}{\binom{s}{t}} X_a^T \mathbf{y}_{a'} = \beta_a^T \Sigma^{2+t} \beta_{a'}$

*Proof.* Denote  $A = (X_a \frac{X^T G^{t-1} X}{\binom{s}{t}} X_a^T)_{up}$ .  $A_{i,j}$  can be expanded as

$$\frac{1}{\binom{s}{t}} \sum_{i_1, i_2, \dots, i_t} \mathbf{x}_{a,i}^T \mathbf{x}_{i_1} \mathbf{x}_{i_1}^T \mathbf{x}_{i_2} \mathbf{x}_{i_2}^T \mathbf{x}_{i_3} \dots \mathbf{x}_{i_t} \mathbf{x}_{a,j}.$$

Since  $G$  is an upper triangular matrix, the summation is equivalent to

$$\frac{1}{\binom{s}{t}} \sum_{i_1 < i_2 < \dots < i_t} \mathbf{x}_{a,i}^T \mathbf{x}_{i_1} \mathbf{x}_{i_1}^T \mathbf{x}_{i_2} \mathbf{x}_{i_2}^T \mathbf{x}_{i_3} \dots \mathbf{x}_{i_t} \mathbf{x}_{a,j}.$$

We can further expand  $\frac{1}{\binom{n}{2}\binom{s}{t}}\mathbf{y}_a^T\mathbf{A}\mathbf{y}_a$  as  $\frac{1}{\binom{n}{2}\binom{s}{t}}\sum_{i,j}y_{a,i}A_{i,j}y_{a,j} = \frac{1}{\binom{n}{2}\binom{s}{t}}\sum_{i<j}y_{a,i}A_{i,j}y_{a,j}$  since  $A$  is an upper triangular matrix. Plugging in the expansion of  $A_{i,j}$ , we get the expansion

$$\frac{1}{\binom{s}{k}\binom{n}{2}}\sum_{i<j}y_{a,i}y_{a,j}\mathbf{x}_{a,i}^T\left(\sum_{i_1<i_2<\dots<i_t}\mathbf{x}_{i_1}\mathbf{x}_{i_1}^T\mathbf{x}_{i_2}\mathbf{x}_{i_2}^T\cdots\mathbf{x}_{i_t}\mathbf{x}_{i_t}^T\right)\mathbf{x}_{a,j},$$

which by Proposition 5 is an unbiased estimator of  $\beta_a\Sigma^{t+2}\beta_a$ . The case for  $\beta_a\Sigma^{t+2}\beta_{a'}$  can be proved analogously.  $\square$

We restate Proposition 4 as follows:

**Proposition 4.** *Let  $p(x)$  be a degree  $k+2$  polynomial  $p(x) = \sum_{i=0}^k a_i x^{i+2}$  that approximates the function  $f(x) = x$  for all  $x \in [\sigma_{\min}, \sigma_{\max}]$ , where  $\sigma_{\min}$  and  $\sigma_{\max}$  are the minimum and maximum singular values of  $\Sigma$ . Let  $P = a_0 I_d + \sum_{t=1}^k \frac{a_t}{\binom{s}{t}} X^T G^{t-1} X$  be the matrix  $P$  defined in Algorithm 3. We have that for any  $a \neq a'$ ,*

$$\begin{aligned} \mathbf{E}\left[\left(\frac{\mathbf{y}_a^T(X_a P X_a^T)_{up}\mathbf{y}_a}{\binom{n}{2}} - \beta_a \Sigma \beta_a\right)^2\right] &\leq \min\left(\frac{4}{k^4}, 4e^{-2(k-1)\sqrt{\frac{\sigma_{\min}}{\sigma_{\max}}}}\right) + f(k) \max\left(\frac{d^k}{s^k}, 1\right) \frac{d+n}{n^2}, \\ \mathbf{E}\left[\left(\frac{\mathbf{y}_a^T X_a P X_{a'}^T \mathbf{y}_{a'}}{\binom{n}{2}} - \beta_a \Sigma \beta_{a'}\right)^2\right] &\leq \min\left(\frac{4}{k^4}, 4e^{-2(k-1)\sqrt{\frac{\sigma_{\min}}{\sigma_{\max}}}}\right) + f(k) \max\left(\frac{d^k}{s^k}, 1\right) \frac{d+n}{n^2}, \end{aligned}$$

for  $f(k) = k^{O(k)}$ .

*Proof of Proposition 4.* Notice that  $P = a_0 I_d + \sum_{t=1}^k \frac{a_t}{\binom{s}{t}} X^T G^{t-1} X$ . By definition, we have

$$\begin{aligned} &\mathbf{E}\left[\left(\frac{\mathbf{y}_a^T(X_a P X_a^T)_{up}\mathbf{y}_a}{\binom{n}{2}} - \beta_a \Sigma \beta_a\right)^2\right] \\ &= \mathbf{E}\left[\left(a_0 \frac{\mathbf{y}_a^T(X_a X_a^T)_{up}\mathbf{y}_a}{\binom{n}{2}} - \beta_a^T \Sigma^2 \beta_a + \sum_{t=1}^k \left(\frac{a_t}{\binom{s}{t}} \frac{\mathbf{y}_a^T(X_a X^T G^{t-1} X X_a^T)_{up}\mathbf{y}_a}{\binom{n}{2}} - a_t \beta_a^T \Sigma^{2+t} \beta_a\right)\right.\right. \\ &\quad \left.\left.+ \sum_{t=0}^k \beta_a^T \Sigma^{2+t} \beta_a - \beta_a \Sigma \beta_a\right)^2\right] \\ &= \mathbf{E}\left[\left(a_0 \frac{\mathbf{y}_a^T(X_a X_a^T)_{up}\mathbf{y}_a}{\binom{n}{2}} - \beta_a^T \Sigma^2 \beta_a + \sum_{t=1}^k \left(\frac{a_t}{\binom{s}{t}} \frac{\mathbf{y}_a^T(X_a X^T G^{t-1} X X_a^T)_{up}\mathbf{y}_a}{\binom{n}{2}} - a_t \beta_a^T \Sigma^{2+t} \beta_a\right)\right)^2\right] \\ &\quad + \left(\sum_{t=0}^k \beta_a^T \Sigma^{2+t} \beta_a - \beta_a \Sigma \beta_a\right)^2, \end{aligned}$$

where in the last inequality we use the unbiasedness of these estimators. By Proposition 5, Proposition 6 and due to the fact that for any random variable  $X_1, X_2, \dots, X_k$ ,  $\mathbf{E}[(X_1 + X_2 + \dots + X_k)^2] = \sum_{i,j} \mathbf{E}[X_i X_j] \leq \sum_{i,j} \sqrt{\mathbf{E}[X_i^2] \mathbf{E}[X_j^2]} = (\sum_i \sqrt{\mathbf{E}[X_i^2]})^2$ . The above equation is bounded by

$$\begin{aligned} &\leq k^2 f'(k) \max\left(\frac{d^k}{s^k}, \frac{d}{s}\right) \frac{d+n}{n^2} + \left(\sum_{t=0}^k \beta_a^T \Sigma^{2+t} \beta_a - \beta_a \Sigma \beta_a\right)^2 \\ &\leq f(k) \max\left(\frac{d^k}{s^k}, 1\right) \frac{d+n}{n^2} + \min\left(\frac{4}{k^4}, 4e^{-2(k-1)\sqrt{\frac{\sigma_{\min}}{\sigma_{\max}}}}\right) \end{aligned}$$

where we have applied Proposition 3 of Kong and Valiant (2018) in the last inequality. The case for  $\beta_a \Sigma \beta_{a'}$  can be handled analogously, and this concludes the proof.  $\square$

The following are the auxiliary propositions that facilitate the proof in this sections.



**Fact 3.** For each arm  $a$ , let  $\mu_a = \frac{\sum_j y_{a,j} \mathbf{x}_{a,j}}{n}$ . Then  $\mathbf{E}[\|\mu_a\|^2] = O(\frac{d+n}{n})$

*Proof.*  $\mathbf{E}[\|\mu_a\|^2] = \frac{1}{n^2} (\sum_{i \neq j} y_{a,i} y_{a,j} \mathbf{x}_{a,i}^T \mathbf{x}_{a,j} + \sum_i y_{a,i}^2 \mathbf{x}_{a,i}^T \mathbf{x}_{a,i}) = O(\|\beta_a\|^2) + \frac{1}{n^2} \sum_i y_{a,i}^2 \mathbf{x}_{a,i}^T \mathbf{x}_{a,i} \leq O((1 + \frac{nd}{n^2})\sigma_a^2) = O(\frac{n+d}{n})$ .  $\square$

The following proposition is a slightly more stronger version of Proposition 3. We omit the proof since it is almost identical to the proof of Proposition 3.

**Proposition 7.** For arm  $a \neq a'$ , let  $\mu_a = \frac{\sum_j y_{a,j} \mathbf{x}_{a,j}}{n}$ ,  $\mu_{a'} = \frac{\sum_j y_{a',j} \mathbf{x}_{a',j}}{n}$ . Let  $A$  be a real  $d \times d$  matrix such that  $\|A\| = O(1)$ . We have  $\mathbf{Var}[\mu_a A \mu_b] = O(\frac{d+n}{n^2})$

## D.2 Proof of Theorem 5 and Corollary 7, Main Result in the Unknown Covariance Setting

We are ready to prove the main theorem of the unknown covariance, and we restate Theorem 5 as follows,

**Theorem 5.** In the unknown covariance setting, for any positive integer  $k$ , with probability  $1 - \delta$ , Algorithm 1 estimates the optimal reward  $OPT$  with additive error:

$$|OPT - \widehat{OPT}| \leq O \left( \sqrt{\log K} \left( \min\left(\frac{1}{k^2}, e^{-(k-1)\sqrt{\frac{\sigma_{\min}}{\sigma_{\max}}}}\right) + f(k) \max\left(\frac{d^{k/2}}{s^{k/2}}, 1\right) \sqrt{\frac{d+n}{n^2}} \right)^{1/2} \right),$$

where  $f(k) = k^{O(k)}$ .

*Proof of Theorem 5.* Applying Fact 11 on top of Corollary 6, we have that for a fixed  $i, j$ , with probability at least  $1 - \delta/(K^2 + K)$ , the median estimates  $\hat{H}$  of Algorithm 1 satisfies

$$|\hat{H}_{i,j} - H_{i,j}| \leq \min\left(\frac{2}{k^2}, 2e^{-(k-1)\sqrt{\frac{\sigma_{\min}}{\sigma_{\max}}}}\right) + f(k) \max\left(\frac{d^{k/2}}{s^{k/2}}, 1\right) \sqrt{\frac{d+n}{n^2}}.$$

Applying Fact 11 with Corollary 4, we get that for a fixed  $i$ , with probability at least  $1 - \delta/(K^2 + K)$ , the median estimates  $\hat{\mathbf{b}}$  of Algorithm 1 satisfies  $|\hat{b}_i - b_i| = O(\sqrt{\frac{1}{n}})$ . Hence by a union bound, we have that with probability at least  $1 - \delta$ ,  $\hat{H}$  and  $\hat{\mathbf{b}}$  satisfy

$$|\hat{H}_{i,j} - H_{i,j}| \leq \min\left(\frac{2}{k^2}, 2e^{-(k-1)\sqrt{\frac{\sigma_{\min}}{\sigma_{\max}}}}\right) + f(k) \max\left(\frac{d^{k/2}}{s^{k/2}}, 1\right) \sqrt{\frac{d+n}{n^2}}.$$

$$\max_i |\hat{b}_i - b_i| \leq O\left(\sqrt{\frac{1}{n}}\right).$$

In order to bound the discrepancy between  $\hat{H}^{(PSD)}$  and  $H$ , notice that by the optimality of  $\hat{H}^{(PSD)}$ , there is  $\max |\hat{H}_{i,j}^{(PSD)} - \hat{H}_{i,j}| \leq \max |H_{i,j} - \hat{H}_{i,j}|$ . Applying triangle inequality, we have

$$\begin{aligned} & \max |\hat{H}_{i,j}^{(PSD)} - H_{i,j}| \\ & \leq \max |\hat{H}_{i,j}^{(PSD)} - \hat{H}_{i,j}| + \max |H_{i,j} - \hat{H}_{i,j}| \\ & \leq 2 |H_{i,j} - \hat{H}_{i,j}| \end{aligned}$$

Thus, by Proposition 1, with probability  $1 - \delta$  the final estimation error is bounded by

$$|OPT - \widehat{OPT}| \leq O \left( \sqrt{\log K} \left( \min\left(\frac{1}{k^2}, e^{-(k-1)\sqrt{\frac{\sigma_{\min}}{\sigma_{\max}}}}\right) + f(k) \max\left(\frac{d^{k/2}}{s^{k/2}}, 1\right) \sqrt{\frac{d+n}{n^2}} \right)^{1/2} \right).$$

$\square$

*Proof of Corollary 7.* Let  $C$  be the constant in Theorem 5. We can find constants  $C_1, C_2$  such that setting  $k = \min(C_1\sqrt{\log K}/\epsilon, \sqrt{\frac{\sigma_{\max}}{\sigma_{\min}}}(\log(\log K/\epsilon^2) + C_2))$  implies that

$$C^2 \log K \min\left(\frac{1}{k^2}, e^{-(k-1)\sqrt{\frac{\sigma_{\min}}{\sigma_{\max}}}}\right) \leq \frac{\epsilon^2}{2}.$$

Then we set

$$n = \Theta\left(\max\left(\frac{(\log K)^{2/(k+2)} k^{O(1)} d^{1-1/(k+2)}}{\epsilon^{4/(k+2)} K^{1-2/(k+2)}}, \frac{k^{O(k)} \log K \sqrt{d}}{\epsilon^2}\right)\right),$$

and it can be verified that

$$C \log K f(k) \max\left(\frac{d^{k/2}}{(Kn/2)^{k/2}}, 1\right) \sqrt{\frac{d+n}{n^2}} \leq \frac{\epsilon^2}{2},$$

where we have applied the assumption that  $\epsilon \geq \frac{\sqrt{\log K}}{d^{1/4}}$ . Given our assumption on  $k$ , it is straightforward to verify that  $(\log K)^{2/(k+2)}/\epsilon^{4/(k+2)} = O(1)$ . Hence the condition on  $n$  can be simplified to

$$n = \Theta\left(\max\left(\frac{k^{O(1)} d^{1-1/(k+2)}}{K^{1-2/(k+2)}}, \frac{k^{O(k)} \log K \sqrt{d}}{\epsilon^2}\right)\right).$$

Given these  $n$  and  $k$ , it is not hard to verify that

$$\begin{aligned} & C\sqrt{\log K} \left(\min\left(\frac{1}{k^2}, e^{-(k-1)\sqrt{\frac{\sigma_{\min}}{\sigma_{\max}}}}\right) \right. \\ & \left. + f(k) \max\left(\frac{d^{k/2}}{(Kn/2)^{k/2}}, 1\right) \sqrt{\frac{d+n}{n^2}}\right)^{1/2} \leq \epsilon, \end{aligned}$$

and this concludes the proof.  $\square$

### D.3 Proof of Corollary 3, Estimating OPT with a Large Set of Unlabeled Examples

*Proof of Corollary 3.* Denote multiset  $S = \{\mathbf{x}_1, \dots, \mathbf{x}_s\}$  as the set of unlabeled examples where  $s = \Theta((d + \log 1/\delta) \log^2 K/\epsilon^4)$ , and  $\hat{\Sigma} = \frac{1}{s} \sum_{i=1}^s \mathbf{x}_i \mathbf{x}_i^T$  as the covariance estimator. By standard matrix concentration results (e.g. Corollary 5.50 in Vershynin (2010)), we have that with probability  $1 - \delta/2$ ,  $(1 - \epsilon^2/\log K)I \preceq \hat{\Sigma}^{-1/2} \Sigma \hat{\Sigma}^{-1/2} \preceq (1 + \epsilon^2/\log K)I$ .

Then, we execute the known covariance version of Algorithm 1 but scale each context  $\mathbf{x}_{i,j}$  as  $\hat{\Sigma}^{-1/2} \mathbf{x}_{i,j}$ . Notice that the scaled contexts has variance  $\tilde{\Sigma} := \hat{\Sigma}^{-1/2} \Sigma \hat{\Sigma}^{-1/2}$ , and we define  $\tilde{\beta}_i := \hat{\Sigma}^{1/2} \beta_i$  as the scaled coefficient vectors. As in the proof of Corollary 1, we set  $n = \Theta(\frac{\sqrt{d} \log K}{\epsilon^2})$  which implies with probability  $1 - \delta/2$ , the error due to the variance is  $\max_{i,j} |\hat{H}_{i,j} - \tilde{\beta}_i^T \tilde{\Sigma}^2 \tilde{\beta}_j| = O(\epsilon^2/\log K)$ . The bias term is bounded as

$$\begin{aligned} |H_{i,j} - \tilde{\beta}_i^T \tilde{\Sigma}^2 \tilde{\beta}_j| &= |\tilde{\beta}_i^T \tilde{\Sigma} \tilde{\beta}_j - \tilde{\beta}_i^T \tilde{\Sigma}^2 \tilde{\beta}_j| \\ &= O(\|\tilde{\beta}_i\| \|\tilde{\beta}_j\| \epsilon^2/\log K), \end{aligned}$$

where the last equality holds since  $\max_{x \in [1-\epsilon^2/\log K, 1+\epsilon^2/\log K]} |x^2 - x| = O(\epsilon^2/\log K)$ . Since we assume that  $\beta_i^T \Sigma \beta_i$  is bounded by a constant,  $\|\tilde{\beta}_i\|^2 = \beta_i^T \hat{\Sigma} \beta_i$  is also bounded by a constant. Hence we have

$$\max_{i,j} |\hat{H}_{i,j} - H_{i,j}| = O(\epsilon^2/\log K).$$

The remaining proof follows from the same argument in the proof of Theorem 4.  $\square$

## E Extension to the Mixture of Gaussians Setting

**Problem setting:** In this section, we extend our result to the mixture of Gaussians setting, where we assume each context  $\mathbf{x}$  is drawn from a known mixture of Gaussians distribution  $\sum_{i=1}^M \alpha_i N(\mu_i, \Sigma_i)$ , meaning that the

means  $\mu_i$ 's, covariances  $\Sigma_i$ 's and mixing weights  $\alpha_i$ 's are all known to the algorithm. WLOG, we may assume that the mean of the mixture of Gaussians is 0 and the covariance is identity, namely  $\sum_{i=1}^M \alpha_i \mu_i = 0$  and  $\sum_{i=1}^M \alpha_i (\mu_i \mu_i^\top + \Sigma_i) = I_d$ , since we can always re-project the data to make the condition holds. As usual, we still assume that all  $\|\beta_i\|$  and the variance of the noise  $\sigma_i$  are bounded.

The following simple proposition shows that the optimal expected reward in the mixture of Gaussian model is simply the linear combination of the optimal expected reward for each component.

**Proposition 8.** *In the setting where each context is drawn from a known mixture of Gaussians distribution  $\sum_{m=1}^M \alpha_m N(\mu_m, \Sigma_m)$ , the optimal reward has the following form:*

$$\sum_{m=1}^M \alpha_m \mathbf{E}_{\mathbf{x} \sim N(\mathbf{b}^{(m)}, H^{(m)})} [\max_{k \in [K]} x_k],$$

where  $\mathbf{b}^{(m)} = (\beta_1^\top \mu_m + b_1, \beta_2^\top \mu_m + b_2, \dots, \beta_K^\top \mu_m + b_K) \in R^K$ , and  $H_{k,k'}^{(m)} = \beta_k \Sigma_m \beta_{k'}$ .

*Proof.* We know from the single Gaussian case that the expected optimal reward for the contexts from the  $m$ th Gaussian component is

$$\mathbf{E}_{\mathbf{x} \sim N(\mathbf{b}^{(m)}, H^{(m)})} [\max_{k \in [K]} x_k],$$

where  $\mathbf{b}^{(m)} = (\beta_1^\top \mu_m + b_1, \beta_2^\top \mu_m + b_2, \dots, \beta_K^\top \mu_m + b_K) \in R^K$ , and  $H_{k,k'}^{(m)} = \beta_k \Sigma_m \beta_{k'}$ . The overall optimal expected reward is the weight average of all these rewards with weights  $\alpha_k$ 's.  $\square$

In the following two propositions, we give the estimators for the parameters corresponding to each Gaussian component,  $\mathbf{b}^{(m)}$ ,  $H^{(m)}$  and prove the corresponding variance bounds. Our estimators can be applied to the mixture of Gaussian setting since it only requires the fourth moment of the distribution of  $\mathbf{x}$  to be bounded. Before stating our two propositions, we state the following simple fourth moment property of mixture of Gaussian distribution without proofs.

**Fact 4.** *Suppose  $\mathbf{x} \sim \sum_{i=1}^M \alpha_i N(\mu_i, \Sigma_i)$  and  $\mathbf{E}[\mathbf{x}] = 0$ ,  $\mathbf{E}[\mathbf{x}\mathbf{x}^\top] = I_d$ , it holds for all unit  $d$ -dimensional vectors  $\mathbf{u}, \mathbf{v}$  that*

$$(\mathbf{u}^\top \mathbf{x})^2 (\mathbf{v}^\top \mathbf{x})^2 = O(1)$$

**Proposition 9.** *For each arm  $k \in [K]$ , and Gaussian component  $m \in [M]$ ,*

$$\hat{b}_k^{(m)} = \frac{1}{n} \sum_{i=1}^n y_{k,i} \mathbf{x}_{k,i}^\top \mu_m.$$

Then, for all  $k \in [K], m \in [M]$

$$\mathbf{E}[\hat{\mathbf{b}}_k^{(m)}] = \beta_k^\top \mu_m \tag{10}$$

$$\mathbf{Var}[\hat{\mathbf{b}}_k^{(m)}] = O(\|\mu_m\|^2/n) \tag{11}$$

*Proof.* The proof of the expectation part is trivial. We show the variance bound as follows:

$$\begin{aligned} \mathbf{Var}[\hat{b}_k^{(m)}] &= \mathbf{E}[(\frac{1}{n} \sum_{i=1}^n y_{k,i} \mathbf{x}_{k,i}^\top \mu_m)^2] - \mathbf{E}[(\frac{1}{n} \sum_{i=1}^n y_{k,i} \mathbf{x}_{k,i}^\top \mu_m)]^2 \\ &= \frac{1}{n^2} \sum_{i=1}^n \left( (y_{k,i} \mathbf{x}_{k,i}^\top \mu_m)^2 - (\beta_k \mu_m)^2 \right) \\ &\leq O(\|\mu_m\|^2/n) \end{aligned}$$

$\square$

**Proposition 10.** For each arm  $k \in [K]$ , and Gaussian component  $m \in [M]$ , define

$$\hat{H}_{k,k}^{(m)} = \frac{1}{\binom{n}{2}} \sum_{i < j} y_{k,i} y_{k,j} \mathbf{x}_{k,i}^\top \Sigma_m \mathbf{x}_{k,j},$$

and for each pair of arms  $k \neq k'$ , define

$$\hat{H}_{k,k'}^{(m)} = \frac{1}{n^2} \sum_{i=1}^n \sum_{j=1}^n y_{k,i} y_{k',j} \mathbf{x}_{k,i}^\top \Sigma_m \mathbf{x}_{k',j}.$$

Then, for all  $k, k' \in [K], m \in [M]$

$$\begin{aligned} \mathbf{E}[\hat{H}_{k,k'}^{(m)}] &= \beta_k \Sigma_m \beta_{k'} \\ \mathbf{Var}[\hat{H}_{k,k'}^{(m)}] &= O\left(\frac{\|\Sigma_m\|^2}{n} + \frac{\text{tr}[\Sigma_m^2]}{n^2}\right) \end{aligned}$$

*Proof.* The expectation part of the statement is trivial. We prove the variance bound as follows.  $\mathbf{Var}[\hat{H}_{k,k}^{(m)}]$  can be expressed as

$$\begin{aligned} &\frac{1}{n^4} \sum_{i \neq j, i' \neq j'} (\mathbf{E}[y_{k,i} y_{k,j} y_{k,i'} y_{k,j'} \mathbf{x}_{k,i}^\top \Sigma_m \mathbf{x}_{k,j} \mathbf{x}_{k,i'}^\top \Sigma_m \mathbf{x}_{k,j'}] \\ &\quad - \mathbf{E}[y_{k,i} y_{k,j} \mathbf{x}_{k,i}^\top \Sigma_m \mathbf{x}_{k,j}] \mathbf{E}[y_{k,i'} y_{k,j'} \mathbf{x}_{k,i'}^\top \Sigma_m \mathbf{x}_{k,j'}]). \end{aligned}$$

For each term in the summation, we classify it into one of the 3 different cases according to  $i, j, i', j'$ :

1. If  $i \neq i'$  and  $j \neq j'$ , the term is 0.
2. If  $i = i'$  and  $j \neq j'$ , the term can then be expressed as:  $\mathbf{E}[y_{k,i}^2 y_{k,j} y_{k,j'} \mathbf{x}_{k,i}^\top \Sigma_m \mathbf{x}_{k,j} \mathbf{x}_{k,i}^\top \Sigma_m \mathbf{x}_{k,j'}] - (\beta_k^\top \Sigma_m \beta_k)^2 = \mathbf{E}[y_{k,i}^2 (\beta_k^\top \Sigma_m \mathbf{x}_{k,i})^2] - (\beta_k^\top \Sigma_m \beta_k)^2 \leq \beta_k^\top \Sigma_m^2 \beta_k \leq \|\Sigma_m\|^2$ , where the last inequality follows from the 4-th moment condition of mixture of Gaussian distribution.
3. If  $i \neq i'$  and  $j = j'$ , this case is symmetric to the last case.
4. If  $i = i'$  and  $j = j'$ , the term can then be expressed as:  $\mathbf{E}[y_{k,i}^2 y_{k,j}^2 (\mathbf{x}_{k,i}^\top \Sigma_m \mathbf{x}_{k,j})^2] - (\beta_k^\top \Sigma_m \beta_k)^2$ . First taking the expectation over  $\mathbf{x}_{a',j}, y_{a',j}$ , we get the following upper bound

$$O(\mathbf{E}[y_{k,i}^2 (\mathbf{x}_{k,i}^\top \Sigma_m^2 \mathbf{x}_{k,i})]).$$

Notice that  $\mathbf{x}_{k,i}^\top \Sigma_m^2 \mathbf{x}_{k,i} = \sum_{l=1}^d d_j^2 (\mathbf{v}_j^\top \mathbf{x}_{a,i})^2$ , where  $d_j, \mathbf{v}_j$  are the eigenvalues and eigenvectors of the matrix  $\Sigma_m$ . Taking the expectation over the  $i$ th sample and applying the fourth moment condition of  $\mathbf{x}$ , we get the following bound:  $O(\text{tr}[\Sigma_m^2])$ .

The final step is to sum the contributions of these 3 cases. Case 2 and 3 have  $O(n^3)$  different quadruples  $(i, j, i', j')$ . Case 4 has  $O(n^2)$  different quadruples  $(i, j, i', j')$ . Combining the resulting bounds yields a  $O(\|\Sigma_m\|_2^2/n + \text{tr}[\Sigma_m^2]/n^2)$  upper bound.

The  $k \neq k'$  case can be proved analogously. □

We restate the main theorem of the mixture of Gaussians setting as follows,

**Theorem 3.** Suppose each context  $\mathbf{x}$  is drawn independently from a mixture of Gaussian distribution  $\sum_{i=1}^M \alpha_i N(\mu_i, \Sigma_i)$ , and the parameters  $\mu_i, \Sigma_i, \alpha_i$  are all known to the algorithm. In addition, let us assume that  $\|\mu_i\|, \|\Sigma_i\|$  are all bounded by a constant. Then, for any  $\epsilon \geq \frac{\sqrt{\log K}}{d^{1/4}}$ , with probability  $1 - \delta$ , there is an algorithm that estimate the optimal reward  $OPT$  with additive error  $\epsilon$  using a total number of samples

$$T = \Theta\left(\frac{\sqrt{d} K \log K}{\epsilon^2} \log(KM/\delta)\right).$$

*Proof.* Since  $\|\mu_m\|, \|\Sigma_m\|$  are all bounded for all  $m \in [M]$ , we have that for each  $k, k' \in [K]$  and  $m \in [M]$ , it holds that with probability  $2/3$

$$|\hat{b}_k^{(m)} - b_k^{(m)}| = O(1/\sqrt{n}),$$

$$|\hat{H}_{k,k'}^{(m)} - H_{k,k'}^{(m)}| = O(\sqrt{n+d}/n).$$

Using the median of means trick as in Algorithm 1, we have that given  $\frac{\sqrt{d} \log K}{\epsilon^2} \log(MK/\delta)$  iid samples for each arm  $k$ , it holds for all  $m \in [M]$  that with probability  $1 - \delta$

$$|\hat{b}_k^{(m)} - b_k^{(m)}| = O(\epsilon/\sqrt{\log K}),$$

$$|\hat{H}_{k,k'}^{(m)} - H_{k,k'}^{(m)}| = O(\epsilon^2/\log K),$$

where we need  $\epsilon \geq \sqrt{\log K}/d^{1/4}$  for this to hold. The optimal reward for each component  $m$  is

$$OPT^{(m)} = \mathbf{E}_{\mathbf{x} \sim N(\mathbf{b}^{(m)}, H^{(m)})}[\max_{k \in [K]} x_k],$$

and by Proposition 1, we can derive estimator  $\widehat{OPT}^{(m)}$  such that  $|\widehat{OPT}^{(m)} - OPT^{(m)}| \leq \epsilon$ . Our final estimator satisfies

$$|\widehat{OPT} - OPT| \leq \sum_{i=1}^M \alpha_i |\widehat{OPT}^{(m)} - OPT^{(m)}| \leq \epsilon,$$

and uses a total of

$$T = \Theta\left(\frac{\sqrt{d}K \log K}{\epsilon^2} \log(KM/\delta)\right)$$

samples. □

## F Minimax Lowerbound for Passive Algorithms

In this section, we prove the following proposition about the information theoretical lower bound for estimating the optimal reward, which is equivalent to Theorem 1.

**Proposition 11** (Restatement of Theorem 1). *Given  $\frac{\sqrt{d}}{\epsilon}$  samples of each arm, there is no algorithm that can estimate the optimal reward with additive error  $O(\sqrt{\epsilon \log K})$  with probability better than  $2/3$ .*

*Proof.* We show our lower bound by upper bounding the total variational distance between the following two cases:

1. Draw  $n$  independent samples  $(\mathbf{x}_1, y_1), \dots, (\mathbf{x}_n, y_n)$  where  $\mathbf{x}_i \sim N(0, I), y_i \sim N(0, 1)$ . Repeat this procedure  $K$  times.
2. First pick a uniformly random unit vector  $v$  and set  $b = \sqrt{\epsilon}$  with probability  $1/\sqrt{K}$  and  $b = 0$  with probability  $1 - 1/\sqrt{K}$ , then draw  $n$  independent samples  $(\mathbf{x}_1, y_1), \dots, (\mathbf{x}_n, y_n)$  where  $\mathbf{x}_i \sim N(0, I), y_i = bv^T \mathbf{x}_i + \eta_i$ , where  $\eta_i \sim N(0, 1 - b^2)$ . Repeat this procedure  $K$  times.

The optimal reward of case 1 is always 0, while with the help of Fact 10, it is easy to verify that the expected optimal reward of case 2 is  $\Omega(\sqrt{\epsilon \log K})$ . We are going to prove that no algorithm can distinguish the two cases with probability more than  $2/3$ . Let  $Q_n$  denote the joint distribution of  $(\mathbf{x}_1, y_1), \dots, (\mathbf{x}_n, y_n)$  in case 2. Our goal is to bound the total variation distance  $D_{TV}(Q_n^{\otimes K}, N(0, I)^{\otimes nK})$  which is smaller than  $\frac{\sqrt{\chi^2(Q_n^{\otimes K}, N(0, I)^{\otimes nK})}}{2}$  by the properties of chi-square divergence.

In case 2, for a fixed  $v$  and  $b$ , the conditional distribution  $\mathbf{x}|y \sim N(ybv, I - b^2vv^T)$ . Let  $P_{y,v}$  denote such a conditional distribution. The chi-square divergence can be expressed as:

$$\begin{aligned}
 & 1 + \chi^2(Q_n^{\otimes K}, N(0, I)^{\otimes nK}) \\
 &= \left( \int_{\mathbf{x}_1, y_1} \cdots \int_{\mathbf{x}_n, y_n} \frac{\left( \frac{1}{\sqrt{K}} \int_{v \in \mathcal{S}^d} \prod_{i=1}^n P_{y_i, v}(\mathbf{x}_i) G(y_i) dv + \left(1 - \frac{1}{\sqrt{K}}\right) \prod_{i=1}^n G(\mathbf{x}_i) G(y_i) \right)^2}{\prod_{i=1}^n G(\mathbf{x}_i) G(y_i)} \right. \\
 & d\mathbf{x}_1 dy_1 \cdots d\mathbf{x}_n dy_n \Big)^K \\
 &= \left( \frac{1}{K} \int_{\mathbf{x}_1, y_1} \cdots \int_{\mathbf{x}_n, y_n} \int_{v \in \mathcal{S}^d} \int_{v' \in \mathcal{S}^d} \prod_{i=1}^n \frac{P_{y_i, v}(\mathbf{x}_i) P_{y_i, v'}(\mathbf{x}_i) G(y_i)}{G(\mathbf{x}_i)} dv dv' d\mathbf{x}_1 dy_1 \cdots d\mathbf{x}_n dy_n \right. \\
 & \left. + \left(1 - \frac{1}{K}\right)^K \right) \\
 &= \left( \frac{1}{K} \int_{v \in \mathcal{S}^d} \int_{v' \in \mathcal{S}^d} \left( \int_y \int_{\mathbf{x}} \frac{P_{y, v}(\mathbf{x}) P_{y, v'}(\mathbf{x}) G(y)}{G(\mathbf{x})} d\mathbf{x} dy \right)^n dv dv' + \left(1 - \frac{1}{K}\right)^K \right)
 \end{aligned}$$

By the proof of Proposition 2 in Kong and Valiant (2018), we have  $\int_{v \in \mathcal{S}^d} \int_{v' \in \mathcal{S}^d} \left( \int_y \int_{\mathbf{x}} \frac{P_{y, v}(\mathbf{x}) P_{y, v'}(\mathbf{x}) G(y)}{G(\mathbf{x})} d\mathbf{x} dy \right)^n dv dv' \leq 2$ . Hence the above equation is bounded by  $(1 + \frac{1}{K})^K \leq e$ , and the total variation distance satisfies  $D_{TV}(Q_n^{\otimes K}, N(0, I)^{\otimes nK}) \leq 0.65$ .  $\square$

## G Minimax Lowerbound for Adaptive Algorithms

This section is dedicated for the proof of Theorem 2. We restate Theorem 2 as follows:

**Theorem 2.** *In the known covariance setting, there exists a constant  $C$  such that no algorithm can estimate the optimal reward with additive error  $\epsilon$  with probability  $2/3$  within*

$$T = C \frac{\sqrt{dK}}{\epsilon^2 \log(dK)^{3/2}}$$

rounds.

We begin with some definitions of the notations to facilitate the proof.

### G.1 Notation

Assuming we are in the contextual multi-armed bandit setting where each context  $\mathbf{x}_i$  is drawn from  $N(0, I_d)$ , and a bandit is defined by the set of  $K$  coefficient vectors  $(\beta_1, \dots, \beta_K)$ . Given a policy  $\pi$ , and a bandit problem  $\nu$ , let  $(\mathbf{x}_1, a_1, r_1, \dots, \mathbf{x}_T, a_T, r_T)$  denote the context, action, reward trajectory induced by the policy  $\pi$  and bandit  $\nu$  with arms' coefficients  $(\beta_1, \dots, \beta_K)$ , whose distribution is  $\mathbb{P}_\nu$ , and let  $\mathbb{P}_{\nu'}$  be the distribution of the trajectory of problem  $\nu'$  with arms' coefficients  $(\beta'_1, \dots, \beta'_K)$ .

For a fixed trajectory  $(\mathbf{x}_1, a_1, r_1, \dots, \mathbf{x}_T, a_T, r_T)$ , let  $T_a = \sum_{t=1}^T \mathbf{1}\{a_t = a\}$ ,  $X_a \in R^{T_a \times d}$  consists of the  $\mathbf{x}_t$ 's where  $a_t = a$ , and  $\mathbf{r}_a \in R^{T_a}$  consists of the  $r_i$ 's where  $a_t = a$ . Further, let  $\mathbf{x}_{a,i}, i \in [T_a]$  be the columns of  $X_a^\top$  and  $r_{a,i}, i \in [T_a]$  be the elements of  $\mathbf{r}_a$ . Given  $\mathbf{x}_1, \dots, \mathbf{x}_T$ , Let  $S_i, i \in [\sum_{j=1}^s \binom{T}{s}]$  be all the subset of size at most  $s$  of  $\mathbf{x}_1, \dots, \mathbf{x}_n$ , and  $W_i$  be the matrix whose rows are the elements of  $S_i$ .

Finally, we define  $a^* = \operatorname{argmin}_a \mathbf{E}[T_a]$ .

### G.2 Proof

**Intuition:** One classical approach to prove regret lower bound in the stochastic bandit (non-contextual setting) is, for a given algorithm, to construct two bandit problem there is different in a single arm and bound the KL-divergence between the trajectories generated by the algorithm (see, e.g. Chapter 15 of Lattimore and Szepesvári (2018)). Let  $P_a, P'_a$  be the distribution of the reward of arm  $a$  in the two problems. There is beautiful divergence decomposition result (Lemma 15.1 in Lattimore and Szepesvári (2018)) which decompose the KL divergence

between the trajectories as  $\sum_{a=1}^K \mathbf{E}[T_a] D_{\text{KL}}(P_a, P'_a)$ . In our contextual bandit setting, roughly speaking, there is a similar decomposition, but instead of  $\mathbf{E}[T_a]$ , the KL divergence is roughly  $\sum_{a=1}^K \mathbf{E}[T_a^2/d]$ . Since it is possible to make  $\mathbf{E}[T_a^2] = T^2/K$  for all  $a$ , which means that  $T = \sqrt{Kd}$  suffices to make the KL-divergence greater than constant. Basically, the algorithm that randomly picks an arm and keeps pulling it for  $T$  rounds is going to break the KL-divergence with bandit instances constructed this way.

However, it is clear that this algorithm is not going to succeed with probability more than  $1/K$ , and the total variation distance between the trajectories must be small. In order to get around with this issue with bounding KL-divergence, instead of focusing  $\mathbf{E}[T_a]$  or  $\mathbf{E}[T_a^2]$ , we look at the probability that  $T_a$  is greater than  $\sqrt{d}$ . Roughly speaking, there must be an arm  $a$  such that  $\Pr(T_a \geq \sqrt{d})$  is small (Fact 7), and for these cases, we will bound the total variation just by its probability. While for the part where  $T_a \leq \sqrt{d}$ , we will bound the KL divergence (Lemma 5) on the part and Pinsker inequality to obtain a total variation bound.

Our proof proceeds as follows. Given any adaptive algorithm that play the bandit game for  $T$  rounds and output an estimate of  $OPT$ , we are going to find two bandit problem where the trajectory generated by the algorithm is indistinguishable in the two cases, while the  $OPT$  in the two cases are very different. The following classical fact shows that as long as the trajectories is similar in the two cases, the output of the algorithm is going to be similar as well.

**Fact 5.** *Given any algorithm  $A$  that interact with bandit and output a quantity  $\widehat{OPT}$ , let  $\mathbb{P}_\nu, \mathbb{P}_{\nu'}$  be the distribution of the trajectory of  $A$  interacting with  $\nu, \nu'$ , and  $\mathbb{Q}_\nu, \mathbb{Q}_{\nu'}$  be the distribution of the output  $\widehat{OPT}$  under  $\nu$  and  $\nu'$ . If  $D_{\text{TV}}(\mathbb{P}_\nu, \mathbb{P}_{\nu'}) \leq \delta$ , then  $D_{\text{TV}}(\mathbb{Q}_\nu, \mathbb{Q}_{\nu'}) \leq \delta$ .*

Given this fact, what we need is to find the two bandit problems, such that  $|OPT_\nu - OPT_{\nu'}| = \Theta(\epsilon)$ , and the  $D_{\text{TV}}(\mathbb{P}_\nu, \mathbb{P}_{\nu'}) \leq 1/3$ . With a coupling argument, it is easy to see that the algorithm much incur  $\Theta(\epsilon)$  error with probability  $2/3$  in one of the two cases. The following lemma asserts the existence of such two bandit problems.

**Lemma 3** (Main lemma for the lower bound in the adaptive setting). *For any policy  $\pi$ , there exists two  $K$ -arm bandit  $\nu$  and  $\nu'$  such that  $|\mathbf{E}_{\mathbf{x} \sim N(0, I_d)}[\max_i \beta_i \mathbf{x}] - \mathbf{E}_{\mathbf{x} \sim N(0, I_d)}[\max_i \beta'_i \mathbf{x}]| \geq \epsilon$ , and with  $T = \frac{C\sqrt{d}K}{\epsilon^2(\log dK)^{3/2}}$  rounds for a constant  $C$ , the total variance distance between the trajectories satisfies  $D_{\text{TV}}(\mathbb{P}_\nu, \mathbb{P}_{\nu'}) \leq 1/3$ .*

Our main theorem of this section, Theorem 2, is immediately implied by Lemma 3 and Fact 5. We prove Lemma 3 in the remainder of this section.

**Fact 6** (Matrix concentration). *Given  $\mathbf{x}_1, \dots, \mathbf{x}_T$  independently drawn from  $N(0, I_d)$ , let  $S_i, i \in [\sum_{j=1}^s \binom{T}{s}]$  be all the subset of size at most  $s$  of  $\mathbf{x}_1, \dots, \mathbf{x}_n$ , and  $W_i$  be the matrix whose rows are the elements of  $S_i$ .*

$$\Pr(\max_i \|I - W_i W_i^\top / d\| \geq C \frac{\sqrt{s}}{\sqrt{d}} + \max(\frac{t}{\sqrt{d}}, \frac{t^2}{d})) \leq \exp(s(1 + \log(T/s)) - ct^2)$$

*Proof.* The proof follows from Remark 5.59 of Vershynin (2010) and a union bound.  $\square$

The following fact shows that there exists an arm, such that with good probability, it does not get pulled by more than  $O(T/K)$  times .

**Fact 7.** *Recall that  $a^* = \operatorname{argmin}_a \mathbf{E}[T_a]$ . Then*

$$\Pr(T_{a^*} \leq \frac{1}{\delta} \frac{T}{K}) \geq 1 - \delta.$$

*Proof.* Since  $\mathbf{E}[\sum_{a=1}^K T_a] = T$ , we have  $\mathbf{E}[T_{a^*}] \leq T/K$ , and the claim then follows from Markov's inequality.  $\square$

We define the two instance  $\nu, \nu'$  as follows,

**Definition 1.** *We define  $\nu$  to be the bandit problem with coefficient vectors  $\beta_i = 0$  for all  $i \in [m]$  and the noise for each arm follows from  $N(0, 1)$ , and  $\nu'$  to be the same as  $\nu$  except that with  $\beta_{a^*} \sim N(0, \epsilon^2 I_d/d)$  and the noise of the arm  $a^*$  is drawn from  $N(0, 1 - \epsilon^2)$ .*

The following lemma shows that  $T_{a^*}$  is small, and the context  $\mathbf{x}_i$ 's are "typical" with good probability.

**Lemma 4** (Good set). *Define the set  $E$  to be a set of the trajectories such that, for a constant  $c$ , for all  $i \in [T]$ ,  $r_i \leq c\sqrt{\log T}$  and  $|\mathbf{x}_i^\top \mathbf{x}_i/d - 1| \leq c\frac{\sqrt{\log T}}{\sqrt{d}}$ , and for all  $i \in [\sum_{j=1}^s \binom{T}{s}]$ ,  $\|I - W_i W_i^\top/d\| \leq c\frac{\sqrt{s \log T}}{\sqrt{d}}$ ,  $T_{a^*} \leq s$ , where  $s = c\frac{T}{K}$ . Then there exists a constant  $c$ , such that  $\mathbb{P}_\nu(E) \geq 99/100$ .*

*Proof.* By Fact 7, we can find a constant  $c_1$  such that  $\mathbb{P}_\nu(T_{a^*} \leq s = c_1 T/K) \leq 1 - 1/1000$ . Notice that under  $\nu$ , each reward  $r_i \sim N(0, 1)$ , and by Fact 9 we can find a constant  $c_2$  such that  $r_i \leq c_2\sqrt{T}$  for all  $i \in T$  with probability  $1 - 1/1000$ . By Fact 6, we can find a constant  $c_3$  such that for all  $i \in [\sum_{j=1}^s \binom{T}{s}]$ ,  $\|I - W_i W_i^\top/d\| \leq c\frac{\sqrt{s \log T}}{\sqrt{d}}$  with probability  $1 - 1/1000$ . Finally, by Fact 6 again, we can find a constant  $c_4$  such that  $|\mathbf{x}_i^\top \mathbf{x}_i/d - 1| \leq c_4\frac{\sqrt{\log T}}{\sqrt{d}}$ . Taking a union of the three events and  $c = \max(c_1, c_2, c_3, c_4)$  completes the proof.  $\square$

Finally, the following lemma bound the KL-divergence on the good set, which will be used to bound the total variation with Pinsker inequality.

**Lemma 5.**

$$-\int_E d\mathbb{P}_\nu \log \frac{d\mathbb{P}_{\nu'}}{d\mathbb{P}_\nu} \leq 1/50.$$

We leave the proof of this lemma to the end of this section, and prove the main lemma of this section.

*Proof of Lemma 3.* The total variation distance between  $\mathbb{P}_\nu$  and  $\mathbb{P}_{\nu'}$ ,

$$\begin{aligned} D_{\text{TV}}(\mathbb{P}_\nu, \mathbb{P}_{\nu'}) &\leq \frac{1}{2} \left( \int_{E^c} d\mathbb{P}_{\nu'} + \int_{E^c} d\mathbb{P}_\nu + \int_E |d\mathbb{P}_{\nu'} - d\mathbb{P}_\nu| \right) \\ &\leq \int_{E^c} d\mathbb{P}_\nu + \int_E |d\mathbb{P}_{\nu'} - d\mathbb{P}_\nu| \\ &\leq \int_{E^c} d\mathbb{P}_\nu + \sqrt{2} \sqrt{-\int_E d\mathbb{P}_\nu \log \frac{d\mathbb{P}_{\nu'}}{d\mathbb{P}_\nu} + \int_E d\mathbb{P}_{\nu'} - \int_E d\mathbb{P}_\nu} \\ &\leq 1/100 + \sqrt{2} \sqrt{\int_E d\mathbb{P}_\nu \log \frac{d\mathbb{P}_{\nu'}}{d\mathbb{P}_\nu} + 1/100} \\ &\leq 1/3, \end{aligned}$$

where we applied Pinsker's inequality (Fact 8) in the third last inequality, applied Lemma 4 in the second inequality, and applied Lemma 5 in the last inequality.  $\square$

*Proof.* The density of  $\mathbb{P}_\nu$  can be expressed as

$$p_\nu(\mathbf{x}_1, a_1, r_1, \dots, \mathbf{x}_T, a_T, r_T) = \prod_{t=1}^T \pi_t(a_t | \mathbf{x}_1, a_1, y_1, \dots, x_{t-1}, a_{t-1}, y_{t-1}, \mathbf{x}_t) p(y_t | \mathbf{x}_t, a_t),$$

where  $p(r_t | \mathbf{x}_t, a_t)$  is the density of reward  $r_t$  on context  $\mathbf{x}_t$  and arm  $a_t$  in model  $\nu$ . The density of  $\mathbb{P}_{\nu'}$  is identical except that  $p(r_t | \mathbf{x}_t, a_t)$  is replaced by  $p'(r_t | \mathbf{x}_t, a_t)$ . Then

$$\log \left( \frac{d\mathbb{P}_{\nu'}}{d\mathbb{P}_\nu} (\mathbf{x}_1, a_1, r_1, \dots, \mathbf{x}_T, a_T, r_T) \right) = \sum_{t=1}^T \log \frac{p'(r_t | \mathbf{x}_t, a_t)}{p(r_t | \mathbf{x}_t, a_t)},$$

and

$$-\int_E d\mathbb{P}_\nu \log \left( \frac{d\mathbb{P}_{\nu'}}{d\mathbb{P}_\nu} \right) = \sum_{t=1}^T \int_E \log \frac{p'(r_t | \mathbf{x}_t, a_t)}{p(r_t | \mathbf{x}_t, a_t)} d\mathbb{P}_\nu.$$



Under this setting, we have

$$\begin{aligned}
 & - \int_E d\mathbb{P}_\nu \log\left(\frac{d\mathbb{P}_{\nu'}}{d\mathbb{P}_\nu}\right) = - \int_E d\mathbb{P}_\nu \log \mathbf{E}_{\beta_{a^*}} \prod_{t=1}^T \frac{p'(r_t | \mathbf{x}_t, a_t)}{p(r_t | \mathbf{x}_t, a_t)} \\
 & = - \int_E d\mathbb{P}_\nu \log \mathbf{E}_{\beta_{a^*}} \left[ \prod_{t=1}^T \mathbf{1}\{a_t = a^*\} \frac{1}{\sqrt{1-\epsilon^2}} \exp\left(-\frac{(r_t - \mathbf{x}_t^\top \beta_{a^*})^2}{2(1-\epsilon^2)} + \frac{r_t^2}{2}\right) \right]. \tag{12}
 \end{aligned}$$

We compute the closed form expression of the expectation term as follows,

$$\begin{aligned}
 & \mathbf{E}_{\beta_{a^*}} \left[ \prod_{t=1}^T \mathbf{1}\{a_t = a^*\} \frac{1}{\sqrt{1-\epsilon^2}} \exp\left(-\frac{(r_t - \mathbf{x}_t^\top \beta_{a^*})^2}{2(1-\epsilon^2)} + \frac{r_t^2}{2}\right) \right] \\
 & = (2\pi)^{-d/2} (d/\epsilon^2)^{d/2} \int_{\mathbb{R}^d} (1-\epsilon^2)^{-T_{a^*}/2} \exp\left(-\left(\beta_{a^*}^\top \frac{X_{a^*}^\top X_{a^*}}{2(1-\epsilon^2)} \beta_{a^*} - \frac{(X_{a^*}^\top \mathbf{r}_{a^*})^\top}{1-\epsilon^2} \beta_{a^*} + \frac{\epsilon^2}{2(1-\epsilon^2)} \mathbf{r}_{a^*}^\top \mathbf{r}_{a^*}\right)\right. \\
 & \quad \left. - \beta_{a^*}^\top \frac{dI_d}{2\epsilon^2} \beta_{a^*}\right) d\beta_{a^*} \\
 & = (2\pi)^{-d/2} (d/\epsilon^2)^{d/2} (1-\epsilon^2)^{-T_{a^*}/2} \exp\left(-\frac{\epsilon^2}{2(1-\epsilon^2)} \mathbf{r}_{a^*}^\top \mathbf{r}_{a^*}\right) \int_{\mathbb{R}^d} \exp\left(-\frac{1}{2} \beta_{a^*}^\top A \beta_{a^*} + B \beta_{a^*}\right) d\beta_{a^*}
 \end{aligned}$$

where  $A = \left(\frac{dI_d}{\epsilon^2} + \frac{X_{a^*}^\top X_{a^*}}{(1-\epsilon^2)}\right)$ ,  $B = \frac{X_{a^*}^\top \mathbf{r}_{a^*}}{(1-\epsilon^2)}$ . We can now apply the Gauss integral property and get that the last line equals

$$\begin{aligned}
 & = (2\pi)^{-d/2} (d/\epsilon^2)^{d/2} (1-\epsilon^2)^{-T_{a^*}/2} \exp\left(-\frac{\epsilon^2}{2(1-\epsilon^2)} \mathbf{r}_{a^*}^\top \mathbf{r}_{a^*}\right) \sqrt{\frac{(2\pi)^d}{\det(A)}} \exp\left(\frac{1}{2} B^\top A^{-1} B\right) \\
 & = (d/\epsilon^2)^{d/2} (1-\epsilon^2)^{-T_{a^*}/2} \det(A)^{-1/2} \exp\left(-\frac{\epsilon^2}{2(1-\epsilon^2)} \mathbf{r}_{a^*}^\top \mathbf{r}_{a^*}\right) \exp\left(\frac{1}{2} B^\top A^{-1} B\right).
 \end{aligned}$$

Plugging in the above formula to Equation 12, we have that Equation 12 equals

$$\begin{aligned}
 & = \frac{1}{2} \left( \int_E d\mathbb{P}_\nu \log \det(A) - d \log(d/\epsilon^2) + \int_E d\mathbb{P}_\nu T_{a^*} \log(1-\epsilon^2) \right) \\
 & \quad + \frac{1}{2} \left( \frac{\epsilon^2}{(1-\epsilon^2)} \int_E d\mathbb{P}_\nu \mathbf{r}_{a^*}^\top \mathbf{r}_{a^*} - \int_E d\mathbb{P}_\nu B^\top A^{-1} B \right). \tag{13}
 \end{aligned}$$

Let  $\lambda_1 \geq \lambda_2 \geq \dots \geq \lambda_{T_{a^*}}$  be the eigenvalues of matrix  $X_{a^*}^\top X_{a^*}$ . Then first term can be written as

$$\begin{aligned}
 & \frac{1}{2} \left( \int_E d\mathbb{P}_\nu \log \det(A) - d \log(d/\epsilon^2) + \int_E d\mathbb{P}_\nu T_{a^*} \log(1-\epsilon^2) \right) \\
 & = \frac{1}{2} \int_E d\mathbb{P}_\nu \sum_{i=1}^{T_{a^*}} \log(1 + \epsilon^2(\lambda_i/d - 1)) \leq \frac{\epsilon^2}{2} \int_E d\mathbb{P}_\nu \sum_{i=1}^{T_{a^*}} (\lambda_i/d - 1) \\
 & = \frac{\epsilon^2}{2} \int_E d\mathbb{P}_\nu \sum_{i=1}^{T_{a^*}} (\mathbf{x}_{a,i}^\top \mathbf{x}_{a,i}/d - 1) \leq c \frac{\epsilon^2 T \sqrt{\log T}}{K \sqrt{d}} \tag{14}
 \end{aligned}$$

for a constant  $c$ , where in the third last inequality we used the fact that  $\log(1+x) < x$ , in the second last inequality we used the fact that  $\sum_{i=1}^{T_{a^*}} \lambda_i = \sum_{i=1}^{T_{a^*}} \mathbf{x}_{a,i}^\top \mathbf{x}_{a,i}$  and in the last inequality used Lemma 4 that under set  $E$ ,  $T_a \leq O(\frac{T}{K})$ ,  $\mathbf{x}_{a,i}^\top \mathbf{x}_{a,i}/d - 1 \leq O(\frac{\sqrt{T}}{\sqrt{d}})$ .

For the second term in Equation 13, notice that the eigenvalues of  $\frac{\epsilon^2}{1-\epsilon^2} I - \frac{X_{a^*}}{(1-\epsilon^2)} A^{-1} \frac{X_{a^*}^\top}{(1-\epsilon^2)}$  are

$$\frac{\epsilon^2}{1-\epsilon^2} - \frac{\lambda_i/(1-\epsilon^2)^2}{d/\epsilon^2 + \lambda_i/(1-\epsilon^2)} = \frac{\epsilon^2(1-\lambda_i/d)}{1-\epsilon^2(1-\lambda_i/d)} = \sum_{k=1}^{\infty} (\epsilon^2(1-\lambda_i/d))^k$$

and hence

$$\frac{\epsilon^2}{1-\epsilon^2}I - \frac{X_{a^*}}{(1-\epsilon^2)}A^{-1}\frac{X_{a^*}^\top}{(1-\epsilon^2)} = \sum_{k=1}^{\infty} (\epsilon^2(I_d - X_{a^*}X_{a^*}^\top/d))^k.$$

Plugging in the expression into the second term of Equation 13, the term becomes

$$\frac{1}{2} \sum_{k=1}^{\infty} \epsilon^{2k} \int_E d\mathbb{P}_\nu \mathbf{r}_{a^*}^\top (I_d - X_{a^*}X_{a^*}^\top/d)^k \mathbf{r}_{a^*}$$

For  $k = 1$ , we have

$$\begin{aligned} & 2^{-1}\epsilon^2 \int_E d\mathbb{P}_\nu \mathbf{r}_{a^*}^\top (I_d - X_{a^*}X_{a^*}^\top/d) \mathbf{r}_{a^*} \\ &= 2^{-1}\epsilon^2 \left( \int_E d\mathbb{P}_\nu \sum_{i=1}^{T_{a^*}} r_{a^*,i}^2 (1 - \mathbf{x}_{a^*,i}^\top \mathbf{x}_{a^*,i}/d) + 2 \int_E d\mathbb{P}_\nu \sum_{i<j} r_{a^*,i} r_{a^*,j} \mathbf{x}_{a^*,i}^\top \mathbf{x}_{a^*,j}/d \right) \\ &\leq c\epsilon^2 \left( \frac{T(\log T)^{3/2}}{K\sqrt{d}} + \frac{T^2 \log T}{K^2 d} \right) + \epsilon^2/100, \end{aligned} \quad (15)$$

for a constant  $c$ , where the last equality holds by simply expanding the maxtrix multiplication, and the last inequality holds due to Lemma 4 and Lemma 6.

For the remaining terms with  $k \geq 2$ ,

$$\begin{aligned} & \frac{1}{2} \int_E \mathbb{P}_\nu \mathbf{r}_a^\top \left( \sum_{k=2}^{\infty} \epsilon^{2k} (I_d - X_a X_a^\top/d)^k \right) \mathbf{r}_a \leq \int_E \mathbb{P}_\nu \mathbf{r}_a^\top \mathbf{r}_a \left\| \sum_{k=2}^{\infty} \epsilon^{2k} (I_d - X_a X_a^\top/d)^k \right\| \\ &\leq c\epsilon^4 \frac{T^2 (\log T)^2}{K^2 d}, \end{aligned} \quad (16)$$

for some constant  $c$ , where the last inequality holds due to the fact that  $\mathbf{r}_a^\top \mathbf{r}_a \leq O(\frac{T \log T}{K})$ ,  $\|\epsilon^4 (I_d - X_a X_a^\top/d)^2\| \leq O(\frac{T \log T}{Kd})$  by Lemma 4. Combing Equation 14, 15, 16, we have

$$- \int_E \mathbb{P}_\nu \log \frac{d\mathbb{P}_{\nu'}}{d\mathbb{P}_\nu} \leq O\left(\epsilon^4 \frac{T^2 (\log T)^2}{K^2 d} + \epsilon^2 \frac{T (\log T)^{3/2}}{K\sqrt{d}}\right) + \epsilon^2/100.$$

Since  $\epsilon \leq 1$ , we can find a constant  $C$  such that setting  $T = \frac{CK\sqrt{d}}{\epsilon^2 \log(Kd)^{3/2}}$  gives

$$- \int_E \mathbb{P}_\nu \log \frac{d\mathbb{P}_{\nu'}}{d\mathbb{P}_\nu} \leq 1/50.$$

This conclude the proof.

**Lemma 6.**

$$\int_E d\mathbb{P}_\nu \sum_{i<j} r_{a^*,i} r_{a^*,j} \mathbf{x}_{a^*,i}^\top \mathbf{x}_{a^*,j}/d \geq -C \frac{T^2 \log T}{K^2 d} - 1/100.$$

for a positive constant  $C$ .

Notice that by martingale stopping theorem,

$$\begin{aligned} & \int_{E^c} d\mathbb{P}_\nu \sum_{1 \leq i < j \leq s} r_{a^*,i} r_{a^*,j} \mathbf{x}_{a^*,i}^\top \mathbf{x}_{a^*,j}/d + \int_E d\mathbb{P}_\nu \sum_{1 \leq i < j \leq s} r_{a^*,i} r_{a^*,j} \mathbf{x}_{a^*,i}^\top \mathbf{x}_{a^*,j}/d \\ &= \mathbf{E}_{\mathbb{P}_\nu} \left[ \sum_{1 \leq i < j \leq s} r_{a^*,i} r_{a^*,j} \mathbf{x}_{a^*,i}^\top \mathbf{x}_{a^*,j}/d \right] = 0. \end{aligned}$$

Hence we are going to upper bound

$$\int_{E^c} d\mathbb{P}_\nu \sum_{1 \leq i < j \leq s} r_{a^*,i} r_{a^*,j} \mathbf{x}_{a^*,i}^\top \mathbf{x}_{a^*,j}/d, \quad (17)$$

where  $E^c$  is the complement of set  $E$ , and this is going to imply the lower bound in the lemma. Equation 17 is bounded by,

$$\begin{aligned} & \int_{E^c} d\mathbb{P}_\nu \sum_{1 \leq i < j \leq s} r_{a^*,i} r_{a^*,j} \mathbf{x}_{a^*,i}^\top \mathbf{x}_{a^*,j} / d \leq \int_{E^c} d\mathbb{P}_\nu \left( \sum_{1 \leq i < j \leq s} r_{a^*,i} r_{a^*,j} \mathbf{x}_{a^*,i}^\top \mathbf{x}_{a^*,j} / d \right)^2 + \int_{E^c} d\mathbb{P}_\nu \\ & \leq \mathbf{E}_{\mathbb{P}_\nu} \left[ \left( \sum_{1 \leq i < j \leq s} r_{a^*,i} r_{a^*,j} \mathbf{x}_{a^*,i}^\top \mathbf{x}_{a^*,j} / d \right)^2 \right] + 1/100, \end{aligned}$$

and we have

$$\begin{aligned} & \mathbf{E}_{\mathbb{P}_\nu} \left[ \left( \sum_{1 \leq i < j \leq s} r_{a^*,i} r_{a^*,j} \mathbf{x}_{a^*,i}^\top \mathbf{x}_{a^*,j} / d \right)^2 \right] \\ & = \mathbf{E}_{\mathbb{P}_\nu} \left[ \sum_{i=1}^s \left( \sum_{j=1}^{i-1} r_{a^*,j} \mathbf{x}_{a^*,j}^\top \right) r_{a^*,i} \mathbf{x}_{a^*,i} / d \right]^2 \end{aligned} \quad (18)$$

$$\leq \mathbf{E}_{\mathbb{P}_\nu} \left[ \sum_{i=1}^s \left( \sum_{j=1}^{i-1} r_{a^*,j} \mathbf{x}_{a^*,j}^\top \right) \mathbf{x}_{a^*,i} / d \right]^2, \quad (19)$$

where Equation 18 holds due to the fact that for  $i < j, i' < j'$ ,  $\mathbf{E}_{\mathbb{P}_\nu} [r_{a^*,i} r_{a^*,j} r_{a^*,i'} r_{a^*,j'} \mathbf{x}_{a^*,i}^\top \mathbf{x}_{a^*,j} \mathbf{x}_{a^*,i'}^\top \mathbf{x}_{a^*,j'}^\top] = 0$  unless  $j = j'$ , Formula 19 holds due to  $\mathbf{E}_\nu [r_{a^*,i}^2] = 1$  and  $r_{a^*,i}$  is independent of  $r_{a^*,j}, \mathbf{x}_{a^*,j}$  where  $j < i$ .

Notice that for a single term  $\left( \sum_{j=1}^{i-1} r_{a^*,j} \mathbf{x}_{a^*,j}^\top \right) \mathbf{x}_{a^*,i} / d$  in Formula 19, if we fixed  $r_{a^*,j}, \mathbf{x}_{a^*,j}$  for all  $j < i$ , the algorithm must pick  $\mathbf{x}_{a^*,i}$  from the remaining contexts which is generated independent of  $(\sum_{j=1}^{i-1} r_{a^*,j} \mathbf{x}_{a^*,j}^\top)$ . Hence

$$\mathbf{E}_\nu \left[ \left( \sum_{j=1}^{i-1} r_{a^*,j} \mathbf{x}_{a^*,j}^\top \right) \mathbf{x}_{a^*,i} / d \right]^2 \mathbb{1}_{\{r_{a^*,j}, \mathbf{x}_{a^*,j}\}_{j < i}} \leq \mathbf{E}_\mathbf{z} [\max z_i] = O(\log T \left\| \sum_{j=1}^{i-1} r_{a^*,j} \mathbf{x}_{a^*,j}^\top \right\|^2 / d^2),$$

where  $z_i \sim N(0, \left\| \sum_{j=1}^{i-1} r_{a^*,j} \mathbf{x}_{a^*,j}^\top \right\|^2 / d^2)$  and we have that Formula 19 is bounded by:

$$\begin{aligned} & = O(\log T \mathbf{E}_{\mathbb{P}_\nu} \left[ \sum_{i=1}^s \left\| \sum_{j=1}^{i-1} r_{a^*,j} \mathbf{x}_{a^*,j}^\top \right\|^2 / d^2 \right]) \\ & = O(\log T \mathbf{E}_{\mathbb{P}_\nu} \left[ \sum_{i=1}^s \sum_{j=1}^{i-1} r_{a^*,j}^2 \mathbf{x}_{a^*,j}^\top \mathbf{x}_{a^*,j} / d^2 \right]) \end{aligned} \quad (20)$$

$$= O(\log T s^2 / d) = O\left(\frac{T^2 \log T}{K^2 d}\right), \quad (21)$$

where Equation 20 holds since for  $i \leq j$ ,  $\mathbf{E}_\nu [r_{a^*,i} r_{a^*,j} \mathbf{x}_{a^*,i}^\top \mathbf{x}_{a^*,j}] = 0$ , and Equation 21 holds due to Corollary 8.

Hence we have that Equation 17 is bounded by  $O\left(\frac{T^2 \log T}{K^2 d}\right) + 1/100$ , and hence the lemma holds.  $\square$

The following statement is a standard statement of the concentration of the norm.

**Corollary 8** (Concentration of the norm). *Let  $\mathbf{x}_1, \dots, \mathbf{x}_T$  be independently drawn from  $N(0, I_d)$ . Then  $\mathbf{E}[\max_i \mathbf{x}_i^\top \mathbf{x}_i / d] \leq 1 + O\left(\frac{\sqrt{\log(Td)}}{\sqrt{d}}\right)$ .*

*Proof.* By Fact 6, we have

$$\begin{aligned} & \Pr(\max_i |\mathbf{x}_i^\top \mathbf{x}_i / d - 1| \geq \frac{C}{\sqrt{d}} + \max\left(\frac{t}{\sqrt{d}}, \frac{t^2}{d}\right)) \leq \exp((1 + \log T) - ct^2) \\ \implies & \Pr(\max_i |\mathbf{x}_i^\top \mathbf{x}_i / d - 1| \geq \frac{C}{\sqrt{d}} + t) \leq \exp((1 + \log T) - cd \min(t^2, t)) \end{aligned}$$

By the fact that for any random variable  $X$ ,  $\mathbf{E}[X] \leq t + \int_{x=t}^{\infty} \Pr(X > x)dx$ , we have

$$\begin{aligned} \mathbf{E}[\max_i |\mathbf{x}_i^\top \mathbf{x}_i / d - 1|] &\leq \frac{C + \sqrt{\log(Td)/c}}{\sqrt{d}} + \int_{t=\sqrt{\log T}/\sqrt{cd}}^{\infty} \exp((1 + \log(Td)) - cd \min(t^2, t)) \\ &\leq O\left(\frac{\sqrt{\log(Td)}}{\sqrt{d}}\right). \end{aligned}$$

□

## H Auxiliary Lemmas

**Fact 8** (Pinsker's inequality for arbitrary measure). *Let  $P, Q$  be two positive measure such that  $\int dP \leq 1, \int dQ \leq 1$ . Then*

$$\frac{1}{2} \int |dP - dQ| \leq 2^{-1/2} \sqrt{-\int dP \log \frac{dQ}{dP} + \int dQ - \int dP}.$$

*Proof.* The proof is classic, and we follows the proof of Lemma 2.5 of the book Tsybakov (2008). Notice that the difference between this version of Pinsker's inequality and the classic one is that  $\int P d\mu$  and  $\int Q d\mu$  do not need to be 1, and the proof follows until the last part (first paragraph of page 89 on Tsybakov (2008)) where we have

$$\begin{aligned} \frac{1}{2} \int |dP - dQ| &\leq \frac{1}{2} \sqrt{\int \left(\frac{4}{3}dQ + \frac{2}{3}dP\right) \sqrt{\int (dP \log \frac{dP}{dQ} + dQ - dP)}} \\ &\leq 2^{-1/2} \sqrt{-\int dP \log \frac{dQ}{dP} + \int dQ - \int dP}. \end{aligned}$$

□

**Fact 9** (Upper bound of the expectation of the maximum of Gaussians, see e.g. Kamath (2015)). *Given that  $\mathbf{x} \sim N(0, \Sigma)$  where  $\Sigma \in R^{K \times K}$  and  $\Sigma_{i,i} \leq \sigma^2$  for all  $i = 1, \dots, K$ ,  $\mathbf{E}[\max |x_i|] \leq \sqrt{2}\sigma\sqrt{\log K}$*

**Fact 10** (Lower bound of the expectation of the maximum of Gaussians, see e.g. Kamath (2015)). *Given that  $\mathbf{x} \sim N(0, I_K)$ ,  $\mathbf{E}[\max |x_i|] \geq 0.23\sqrt{\log K}$*

**Fact 11** (Median of means trick). *Given a randomized algorithm that, with probability  $2/3$ , output an estimate  $\hat{x}$  such that  $|\hat{x} - x| \leq \epsilon$ . If we independently execute the algorithm  $t$  times, the median of the estimates satisfies  $|\text{median}(\hat{x}_1, \dots, \hat{x}_t) - x| \leq \epsilon$  with probability at least  $1 - \exp(-t/48)$ .*

*Proof.* Notice that if there is more than  $t/2$  estimates that fall into the interval  $[x - \epsilon, x + \epsilon]$ , the median of the estimates must have error less than  $\epsilon$ . Hence, we only need to upper bound the probability that there are less than  $t/2$  estimates that fall into the interval  $[x - \epsilon, x + \epsilon]$ . Let  $z_i$  be the indicator random variable of whether  $\hat{x}_i$  fall into the interval  $[x - \epsilon, x + \epsilon]$ . By Chernoff bound (Fact 12), we have

$$\Pr\left(\sum_{i=1}^t z_i \leq t/2\right) = \Pr\left(\sum_{i=1}^t z_i \leq \left(1 - \frac{1}{4}\right)\frac{2}{3}t\right) \leq \exp\left(-\frac{t}{48}\right)$$

□

**Fact 12** (Chernoff Bound). *Suppose  $X_1, \dots, X_n$  are independent random variables taking values in  $\{0, 1\}$  with  $\mu = \mathbf{E}[\sum_{i=1}^n X_i]$ . Then for any  $\delta > 0$ ,*

$$\Pr\left(\sum_{i=1}^n X_i \leq (1 - \delta)\mu\right) \leq \exp\left(-\frac{\delta^2\mu}{2}\right)$$
